# Supplementary material
Source: MDPI journal article supplement (https://www.mdpi.com/2624-8549/5/1/44)
Supplement: s1 [file s1]

# Supporting information

For

**Impact of di- and poly-radical character  
on the relative energy of the doubly  
excited and  $L_a$  states of linear acenes and  
cyclacenes**

**Table S1:** Energies of frontier molecular orbitals and H/L gap of [n]-acenes calculated at CS geometry (B3LYP/6-31G\*). Orbital symmetries are indicated in parenthesis.

| Molecule  | CS geometry    |                |                |                |                |                |                |                | $\Delta E$<br>(H/L)<br>(eV) |
|-----------|----------------|----------------|----------------|----------------|----------------|----------------|----------------|----------------|-----------------------------|
|           | L+3<br>(eV)    | L+2<br>(eV)    | L+1<br>(eV)    | L<br>(eV)      | H<br>(eV)      | H-1<br>(eV)    | H-2<br>(eV)    | H-3<br>(eV)    |                             |
| [2]-acene | -              | 0.98<br>(B3U)  | -0.15<br>(B2G) | -0.96<br>(B1G) | -5.79<br>(AU)  | -6.54<br>(B3U) | -7.65<br>(B2G) | -              | 4.83                        |
| [4]-acene | -              | -0.38<br>(B2G) | 0.42<br>(B3U)  | -2.08<br>(B1G) | -4.85<br>(AU)  | -6.33<br>(B2G) | -6.41<br>(B3U) | -              | 2.78                        |
| [6]-acene | -              | -0.48<br>(B2G) | -1.35<br>(B3U) | -2.61<br>(B1G) | -4.41<br>(AU)  | -5.54<br>(B2G) | -6.36<br>(B3U) | -              | 1.80                        |
| [7]-acene | -0.51<br>(AU)  | -0.60<br>(B3U) | -1.67<br>(B1G) | -2.78<br>(B3U) | -4.27<br>(B2G) | -5.27<br>(AU)  | -6.21<br>(B2G) | -6.35<br>(B1G) | 1.49                        |
| [8]-acene | -0.54<br>(B2G) | -0.94<br>(B1G) | -1.93<br>(B3U) | -2.91<br>(B1G) | -4.16<br>(AU)  | -5.05<br>(B2G) | -5.92<br>(AU)  | -6.34<br>(B3U) | 1.25                        |
| [9]-acene | -0.56<br>(AU)  | -1.23<br>(B3U) | -2.14<br>(B1G) | -3.01<br>(B3U) | -4.08<br>(B2G) | -4.87<br>(AU)  | -5.67<br>(B2G) | -6.34<br>(B1G) | 1.07                        |

The inclusion of H-3, H-2, L+2 and L+3 orbitals is due to a different dependence of orbital energies on molecular size, already noticed by Marian and Gilka [1] and Bettinger *et al.*[2]. Considering naphthalene as our reference, its H-1 orbital becomes H-2 for tetracene and hexacene and H-3 for heptacene, octacene and nonacene; while its L+1 orbital will be L+2 orbital for tetracene and hexacene and L+3 for longer acenes. L and H orbitals are practically invariant.

**Table S2:** Energies of frontier molecular orbitals and H/L gap of [n]-acenes calculated at BS geometry (UB3LYP/6-31G\*).

| Molecule  | BS geometry |       |       |         |                       |
|-----------|-------------|-------|-------|---------|-----------------------|
|           | L+1(eV)     | L(eV) | H(eV) | H-1(eV) | $\Delta E$ (H/L) (eV) |
| [6]-acene | -1.34       | -2.56 | -4.46 | -5.54   | 1.89                  |
| [7]-acene | -1.66       | -2.60 | -4.45 | -5.27   | 1.86                  |
| [8]-acene | -1.91       | -2.62 | -4.46 | -5.07   | 1.83                  |
| [9]-acene | -2.10       | -2.64 | -4.46 | -4.91   | 1.82                  |

**Table S3:** Frontier molecular orbital energies and H/L gap of (top) **even** and (bottom) **odd [n]-CCs** calculated at CS geometry (B3LYP/6-31G\*). Where possible, orbital symmetries are indicated in parenthesis.

| <b>EVEN CC</b>  | <b>CS geometry</b> |                |                |                |                |                |                                    |
|-----------------|--------------------|----------------|----------------|----------------|----------------|----------------|------------------------------------|
| <b>Molecule</b> | <b>L+1(2)</b>      | <b>L+1(1)</b>  | <b>L</b>       | <b>H</b>       | <b>H-1(1)</b>  | <b>H-1(2)</b>  | <b><math>\Delta E</math> (H/L)</b> |
| <b>[6]-CC</b>   | -                  | -1.71<br>(A1G) | -2.57<br>(B1G) | -3.81<br>(B2U) | -5.51<br>(E2U) | -5.51<br>(E2U) | 1.24                               |
| <b>[8]-CC</b>   | -1.71<br>(E3G)     | -1.71<br>(E3G) | -2.79<br>(B1U) | -3.89<br>(B2G) | -4.96<br>(E3U) | -4.96<br>(E3U) | 1.11                               |
| <b>[10]-CC</b>  | -2.19<br>(E4G)     | -2.19<br>(E4G) | -2.93<br>(B2G) | -3.93<br>(B1U) | -4.61<br>(E4U) | -4.61<br>(E4U) | 1.00                               |
| <b>[12]-CC</b>  | -2.54              | -2.54          | -3.03          | -3.94          | -4.37          | -4.37          | 0.91                               |

  

| <b>ODD CC</b>   | <b>CS geometry</b> |                |                |                |                 |                 |                 |                 |                                    |
|-----------------|--------------------|----------------|----------------|----------------|-----------------|-----------------|-----------------|-----------------|------------------------------------|
| <b>Molecule</b> | <b>L+1(1)</b>      | <b>L+1(2)</b>  | <b>L(1)</b>    | <b>L(2)</b>    | <b>H(1)</b>     | <b>H(2)</b>     | <b>H-1(1)</b>   | <b>H-1(2)</b>   | <b><math>\Delta E</math> (H/L)</b> |
| <b>[7]-CC</b>   | -                  | -1.01<br>(A1') | -2.41<br>(E3') | -2.41<br>(E3') | -4.06<br>(E3'') | -4.06<br>(E3'') | -6.48<br>(E2'') | -6.48<br>(E2'') | 1.65                               |
| <b>[9]-CC</b>   | -0.94              | -0.94          | -2.79          | -2.79          | -3.92           | -3.92           | -5.83           | -5.83           | 1.13                               |
| <b>[11]-CC</b>  | -1.44              | -1.44          | -3.02          | -3.02          | -3.84           | -3.84           | -5.37           | -5.37           | 0.82                               |

**Table S4:** Frontier molecular orbital energies and H/L gap of (top) **even** and (bottom) **odd [n]-CCs** calculated at BS geometry (UB3LYP/6-31G\*).

| EVEN     | BS geometry |        |       |       |        |        |          |
|----------|-------------|--------|-------|-------|--------|--------|----------|
| Molecule | L+1(2)      | L+1(1) | L     | H     | H-1(1) | H-1(2) | ΔE (H/L) |
| [6]-CC   | -           | -1.68  | -2.02 | -4.29 | -5.57  | -5.57  | 2.27     |
| [8]-CC   | -1.58       | -1.58  | -2.30 | -4.34 | -5.06  | -5.06  | 2.04     |
| [10]-CC  | -2.00       | -2.00  | -2.41 | -4.41 | -4.77  | -4.77  | 2.00     |
| [12]-CC  | -2.26       | -2.26  | -2.45 | -4.48 | -4.61  | -4.61  | 2.04     |

| ODD      | BS geometry |        |       |       |       |       |        |        |          |
|----------|-------------|--------|-------|-------|-------|-------|--------|--------|----------|
| Molecule | L+1(1)      | L+1(2) | L(1)  | L(2)  | H(1)  | H(2)  | H-1(1) | H-1(2) | ΔE (H/L) |
| [7]-CC   | -           | -1.04  | -2.07 | -2.07 | -4.40 | -4.40 | -6.43  | -6.43  | 2.33     |
| [9]-CC   | -0.95       | -0.95  | -2.29 | -2.29 | -4.42 | -4.42 | -5.80  | -5.80  | 2.13     |
| [11]-CC  | -1.43       | -1.43  | -2.42 | -2.42 | -4.44 | -4.44 | -5.37  | -5.37  | 2.02     |

**Table S5:** Energies of (top) **[n]-acenes** and **[n]-CCs** at the optimized CS and BS geometries. CS wavefunctions computed with B3LYP, while BS wavefunctions are determined with UB3LYP functional. 6-31G\* basis set is used. The percentage (%) is calculated as the ratio between  $\Delta E(\text{CS-BS})$  at CS geometry and that at BS geometry.

| CS geometry |                  |                 |                            |                                     | BS geometry     |                            |                                     |    |
|-------------|------------------|-----------------|----------------------------|-------------------------------------|-----------------|----------------------------|-------------------------------------|----|
| Molecule    | E (CS)<br>(a.u.) | E(BS)<br>(a.u.) | S**2<br>BS<br>wavefunction | $\Delta E$<br>(CS-BS)<br>(kcal/mol) | E(BS)<br>(a.u.) | S**2<br>BS<br>wavefunction | $\Delta E$<br>(CS-BS)<br>(kcal/mol) | %  |
| [6]-acene   | -1000.43348912   | -1000.43360947  | 0.17                       | 0.08                                | -1000.43368190  | 0.26                       | 0.12                                | 67 |
| [7]-acene   | -1154.06672393   | -1154.06858321  | 0.61                       | 1.17                                | -1154.06942602  | 0.80                       | 1.70                                | 69 |
| [8]-acene   | -1307.69978771   | -1307.70456197  | 0.91                       | 3.00                                | -1307.70624199  | 1.08                       | 4.05                                | 74 |
| [9]-acene   | -1461.33275688   | -1461.34094364  | 1.13                       | 5.14                                | -1461.34323692  | 1.26                       | 6.58                                | 78 |

  

| CS geometry |                  |                 |                            |                                     | BS geometry     |                            |                                     |    |
|-------------|------------------|-----------------|----------------------------|-------------------------------------|-----------------|----------------------------|-------------------------------------|----|
| Molecule    | E (CS)<br>(a.u.) | E(BS)<br>(a.u.) | S**2<br>BS<br>wavefunction | $\Delta E$<br>(CS-BS)<br>(kcal/mol) | E(BS)<br>(a.u.) | S**2<br>BS<br>wavefunction | $\Delta E$<br>(CS-BS)<br>(kcal/mol) | %  |
| [6]-CC      | -921.45884275    | -921.47142897   | 1.16                       | 7.90                                | -921.47164651   | 1.18                       | 8.03                                | 98 |
| [7]-CC      | -1075.13157369   | -1075.14232577  | 1.59                       | 6.75                                | -1075.14354825  | 1.72                       | 7.51                                | 90 |
| [8]-CC      | -1228.82283487   | -1228.83447070  | 1.29                       | 7.30                                | -1228.83463126  | 1.31                       | 7.40                                | 99 |
| [9]-CC      | -1382.46158009   | -1382.48647919  | 2.17                       | 15.62                               | -1382.48799130  | 2.24                       | 16.57                               | 94 |
| [10]-CC     | -1536.14403499   | -1536.15802429  | 1.62                       | 8.78                                | -1536.15826501  | 1.65                       | 8.93                                | 98 |
| [11]-CC     | -1689.76858012   | -1689.80617543  | 2.48                       | 23.59                               | -1689.80761244  | 2.52                       | 24.49                               | 96 |
| [12]-CC     | -1843.44463744   | -1843.46370024  | 2.12                       | 11.96                               | -1843.46413070  | 2.17                       | 12.23                               | 98 |

**Table S6:** Di- and poly-radical characters of **[n]-acenes** in terms of  $y_0$ ,  $y_1$  and  $N_{FOD}$ .  $y_0$  and  $y_1$  indexes are calculated at PUHF and PUB3LYP levels.  $N_{FOD}$  values are calculated at TPSS/def2-TZVP level with  $T_{el}$  set at 5000K. Both CS-B3LYP and BS-UB3LYP geometries are considered here.

| Molecule ↓ | $y_0^{(PUHF)}$ |           | $y_0^{(PUB3LYP)}$ |           | $y_1^{(PUHF)}$ |           | $y_1^{(PUB3LYP)}$ |           | $N_{FOD}$ |           |
|------------|----------------|-----------|-------------------|-----------|----------------|-----------|-------------------|-----------|-----------|-----------|
| Geometry → | CS-B3LYP       | BS-UB3LYP | CS-B3LYP          | BS-UB3LYP | CS-B3LYP       | BS-UB3LYP | CS-B3LYP          | BS-UB3LYP | CS-B3LYP  | BS-UB3LYP |
| [6]-acene  | 0.54           | 0.56      | 0                 | 0.01      | 0.12           | 0.12      | 0                 | 0         | 1.23      | 1.26      |
| [7]-acene  | 0.64           | 0.70      | 0.06              | 0.13      | 0.18           | 0.18      | 0                 | 0.001     | 1.60      | 1.71      |
| [8]-acene  | 0.73           | 0.79      | 0.17              | 0.33      | 0.25           | 0.25      | 0.001             | 0.002     | 1.98      | 2.13      |
| [9]-acene  | 0.79           | 0.86      | 0.33              | 0.54      | 0.32           | 0.33      | 0.004             | 0.005     | 2.35      | 2.52      |

**Table S7:** Di- and poly-radical characters of (top) even and (bottom) odd **[n]-CCs** in terms of  $y_0$ ,  $y_1$  and  $N_{FOD}$ .  $y_0$  and  $y_1$  indexes are calculated at PUHF and PUB3LYP levels.  $N_{FOD}$  values are calculated at TPSS/def2-TZVP level with  $T_{el}$  set at 5000K. Both CS-B3LYP and BS-UB3LYP geometries are considered here.

| Molecule ↓ | $y_0^{(PUHF)}$ |           | $y_0^{(PUB3LYP)}$ |           | $y_1^{(PUHF)}$ |           | $y_1^{(PUB3LYP)}$ |           | $N_{FOD}$ |           |
|------------|----------------|-----------|-------------------|-----------|----------------|-----------|-------------------|-----------|-----------|-----------|
| Geometry → | CS-B3LYP       | BS-UB3LYP | CS-B3LYP          | BS-UB3LYP | CS-B3LYP       | BS-UB3LYP | CS-B3LYP          | BS-UB3LYP | CS-B3LYP  | BS-UB3LYP |
| [6]-CC     | 0.84           | 0.85      | 0.37              | 0.39      | 0.16           | 0.16      | 0.001             | 0.001     | 1.77      | 1.79      |
| [8]-CC     | 0.85           | 0.85      | 0.37              | 0.38      | 0.26           | 0.26      | 0.003             | 0.003     | 1.86      | 1.88      |
| [10]-CC    | 0.85           | 0.86      | 0.40              | 0.41      | 0.39           | 0.40      | 0.012             | 0.013     | 2.43      | 2.46      |
| [12]-CC    | 0.85           | 0.86      | 0.44              | 0.44      | 0.52           | 0.53      | 0.043             | 0.048     | 3.16      | 3.2       |

  

| Molecule ↓ | $y_0^{(PUHF)}$ |           | $y_0^{(PUB3LYP)}$ |           | $y_1^{(PUHF)}$ |           | $y_1^{(PUB3LYP)}$ |           | $N_{FOD}$ |           |
|------------|----------------|-----------|-------------------|-----------|----------------|-----------|-------------------|-----------|-----------|-----------|
| Geometry → | CS-B3LYP       | BS-UB3LYP | CS-B3LYP          | BS-UB3LYP | CS-B3LYP       | BS-UB3LYP | CS-B3LYP          | BS-UB3LYP | CS-B3LYP  | BS-UB3LYP |
| [7]-CC     | 0.67           | 0.69      | 0.14              | 0.18      | 0.67           | 0.69      | 0.138             | 0.176     | 2.53      | 2.66      |
| [9]-CC     | 0.81           | 0.83      | 0.42              | 0.48      | 0.81           | 0.83      | 0.424             | 0.479     | 3.47      | 3.59      |
| [11]-CC    | 0.90           | 0.91      | 0.72              | 0.77      | 0.90           | 0.91      | 0.716             | 0.767     | 4.27      | 4.38      |

**Table S8:** Expressions of the BS frontier molecular orbitals in terms of linear combination of CS frontier molecular orbitals.

|                                                                                  |
|----------------------------------------------------------------------------------|
| $H_{\alpha} = \varphi_{HOMO}^{\alpha} = \cos \theta H_{CS} + \sin \theta L_{CS}$ |
| $H_{\beta} = \varphi_{HOMO}^{\beta} = \cos \theta H_{CS} - \sin \theta L_{CS}$   |
| $L_{\alpha} = \varphi_{LUMO}^{\alpha} = \sin \theta H_{CS} - \cos \theta L_{CS}$ |
| $L_{\beta} = \varphi_{LUMO}^{\beta} = \sin \theta H_{CS} + \cos \theta L_{CS}$   |

**Table S9:** Excitation energies of the  $L_a$  state, dominated by the  $H \rightarrow L$  excitation, for **[n]-acenes**, calculated at different levels of theory introduced in this work. Comparison with calculated data in literature and experimental results where possible.

| <b>La state</b>  |                                | <b>This work</b>                  |                      |                       |                             |                   |                        |                         |                     |                     |                   |
|------------------|--------------------------------|-----------------------------------|----------------------|-----------------------|-----------------------------|-------------------|------------------------|-------------------------|---------------------|---------------------|-------------------|
| Molecule         | DFT/MRCI<br>R2018 <sup>a</sup> | DFT/MRCI<br>Original <sup>a</sup> | TDB3LYP <sup>a</sup> | TDUB3LYP <sup>a</sup> | SF-<br>TDB3LYP <sup>a</sup> | NEVPT2            | TDPBE0-DH <sup>b</sup> | TDPBE-QIDH <sup>b</sup> | pp-RPA <sup>c</sup> | MCCEPA <sup>d</sup> | <b>Exp.</b>       |
| <b>[2]-acene</b> | 4.67                           | 4.73                              | 4.46                 | /                     | /                           | /                 | 4.85                   | 4.94                    | 4.97                | /                   | 4.66 <sup>e</sup> |
| <b>[3]-acene</b> | 3.49                           | 3.55                              | /                    | /                     | /                           | /                 | 3.71                   | 3.79                    | 3.65                | 3.68                | 3.60 <sup>e</sup> |
| <b>[4]-acene</b> | 2.69                           | 2.77                              | 2.49                 | /                     | /                           | /                 | 2.94                   | 3.01                    | 2.82                | 3.10                | 2.88 <sup>e</sup> |
| <b>[5]-acene</b> | 2.15                           | 2.24                              | /                    | /                     | /                           | /                 | 2.39                   | 2.46                    | 2.26                | 2.67                | 2.21 <sup>f</sup> |
| <b>[6]-acene</b> | 1.77                           | 1.88                              | 1.54                 | 1.56                  | 1.29                        | /                 | 2.00                   | 2.07                    | 1.86                | 2.41                | 1.79 <sup>g</sup> |
| <b>[7]-acene</b> | 1.50                           | 1.63                              | 1.24                 | 1.38                  | 2.95                        | 1.62 <sup>a</sup> | /                      | /                       | 1.58                | 2.27                | 1.65 <sup>d</sup> |
| <b>[8]-acene</b> | 1.32                           | 1.47                              | 1.00                 | 1.30                  | 0.73                        | 1.39 <sup>a</sup> | /                      | /                       | 1.36                | /                   | 1.54 <sup>h</sup> |
| <b>[9]-acene</b> | 1.20                           | 1.37                              | 0.81                 | 1.27                  | 0.58                        | 1.33 <sup>a</sup> | /                      | /                       | 1.20                | /                   | 1.43 <sup>h</sup> |

<sup>a</sup>. DFT/MRCI calculations carried out with def2-SVP basis set, while TDDFT-based calculations carried out with 6-31G\* basis set; NEVPT2 calculations carried out with the strongly contracted variant. The (12,12) space was considered for **[7]-acene** and **[8]-acene**; for **[9]-acene**, the (14,14) space was used.

<sup>b</sup>. from ref. [3]. TDPBE0-DH calculations were carried out with def2-TZVP basis set, while TDPBE-QIDH used def2-QZVP basis set;

<sup>c</sup>. from ref. [4] considering the R geometry;

<sup>d</sup>. from ref. [5]; experimental result from UV-Vis absorption spectrum;

<sup>e</sup>. from ref. [6], derived from experimental 0-0 transition energy in solution;

<sup>f</sup>. from ref. [7], absorption in solid inert gas matrices at 10K;

<sup>g</sup>. from ref. [8], vertical  $S_0 \rightarrow S_1$  energy;

<sup>h</sup>. from ref. [9], UV/Vis absorption spectra in solid Ar at 30K.

**Table S10:** Excitation energies of the DE state, dominated by the H,H→L,L excitation, for **[n]-acenes**, calculated at different levels of theory introduced in this work. Comparison with calculated data in literature and experimental results where possible. Energies of the 2A<sub>g</sub> state of naphthalene calculated at DFT/MRCI level are shown in parenthesis.

| DE (2AG) state   |                             | This work                      |                       |                         |                   |                     |                     |                   |
|------------------|-----------------------------|--------------------------------|-----------------------|-------------------------|-------------------|---------------------|---------------------|-------------------|
| Molecule         | DFT/MRCI R2018 <sup>a</sup> | DFT/MRCI Original <sup>a</sup> | TDUB3LYP <sup>a</sup> | SF-TDB3LYP <sup>a</sup> | NEVPT2            | pp-RPA <sup>b</sup> | MCCEPA <sup>c</sup> | Exp.              |
| <b>[2]-acene</b> | 6.56 (5.96)                 | 5.46 (5.80)                    | /                     | /                       | /                 | 6.43                | /                   | 5.46 <sup>d</sup> |
| <b>[3]-acene</b> | 4.99                        | 4.62                           | /                     | /                       | /                 | 4.87                | 4.76                | 4.96 <sup>e</sup> |
| <b>[4]-acene</b> | 3.84                        | <b>3.43</b>                    | /                     | /                       | /                 | 3.65                | 3.83                | /                 |
| <b>[5]-acene</b> | 2.93                        | <b>2.55</b>                    | /                     | /                       | /                 | 2.74                | 2.92                | /                 |
| <b>[6]-acene</b> | 2.24                        | 1.91                           | 0.55                  | 2.14                    | /                 | 2.05                | 2.62                | /                 |
| <b>[7]-acene</b> | 1.73                        | 1.45                           | 0.95                  | 1.46                    | 1.82 <sup>a</sup> | 1.54                | 2.10                | 1.57 <sup>c</sup> |
| <b>[8]-acene</b> | 1.34                        | 1.13                           | 1.09                  | 1.02                    | 1.44 <sup>a</sup> | 1.14                | /                   | /                 |
| <b>[9]-acene</b> | 1.06                        | 0.93                           | 1.16                  | 0.73                    | 1.18 <sup>a</sup> | 0.84                | /                   | /                 |

<sup>a</sup> DFT/MRCI calculations carried out with def2-SVP basis set, while TDUDFT and SF calculations carried out with 6-31G\* basis set; NEVPT2 calculations carried out with the strongly contracted variant. The (12,12) space was considered for **[7]-acene** and **[8]-acene**; for **[9]-acene**, the (14,14) space was used.

<sup>b</sup> from ref. [4] considering the R geometry;

<sup>c</sup> from ref. [5]; experimental result from UV-Vis absorption spectrum;

<sup>d</sup> from ref. [10], two-photon absorption in cyclohexane;

<sup>e</sup> from ref. [11], two-photon absorption in cyclohexane.



**Table S11:** Excitation energies of the  $L_a$  state, dominated by the  $H \rightarrow L$  excitation, and of the DE state, dominated by  $H,H \rightarrow L,L$  excitation, for even [n]-CCs, calculated at different levels of theory introduced in this work.

| Molecule | La state                    |                                |                |                 |                   | NEVPT2            |
|----------|-----------------------------|--------------------------------|----------------|-----------------|-------------------|-------------------|
|          | DFT/MRCI R2018 <sup>a</sup> | DFT/MRCI Original <sup>a</sup> | TDB3LYP/6-31G* | TDUB3LYP/6-31G* | SF-TDB3LYP/6-31G* |                   |
| [6]-CC   | 1.47                        | 1.73                           | 0.97           | 1.64            | 0.93              | 0.85 <sup>b</sup> |
| [8]-CC   | 1.33                        | 1.54                           | 0.82           | 1.47            | 0.79              | 0.85 <sup>b</sup> |
| [10]-CC  | 1.26                        | 1.44                           | 0.70           | 1.46            | 0.71              | /                 |
| [12]-CC  | 1.22                        | 1.39                           | 0.60           | 1.51            | 0.65              | /                 |

  

| Molecule | DE state       |                   |                  |                    | NEVPT2            |
|----------|----------------|-------------------|------------------|--------------------|-------------------|
|          | DFT/MRCI R2018 | DFT/MRCI Original | TD-UB3LYP/6-31G* | SF-TD-B3LYP/6-31G* |                   |
| [6]-CC   | 1.72           | 1.49              | 1.49             | 1.25               | 1.18 <sup>b</sup> |
| [8]-CC   | 1.47           | 1.24              | 1.35             | 1.11               | 1.02 <sup>b</sup> |
| [10]-CC  | 1.24           | 1.03              | 1.40             | 1.02               | 0.85 <sup>b</sup> |
| [12]-CC  | 1.04           | 0.88              | 1.51             | 0.94               | 0.68 <sup>b</sup> |

<sup>a</sup> DFT/MRCI calculations carried out with def2-SVP basis set.

<sup>b</sup> NEVPT2 calculations carried out with the strongly contracted variant. The (8,8) space was considered for [6]-CC and [8]-CC; for [10]-CC and [12]-CC, the (12,12) space was used.

### [6]-acene

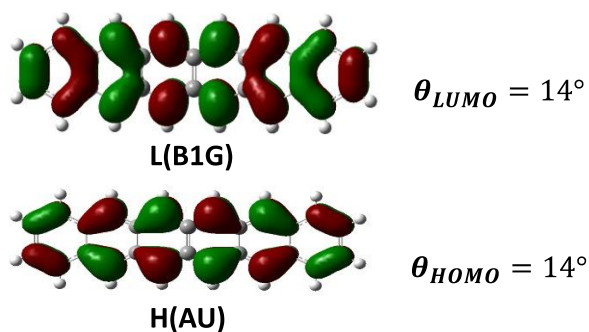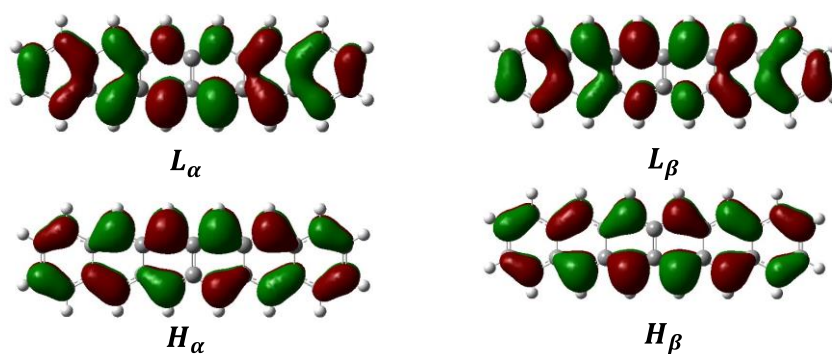

### [7]-acene

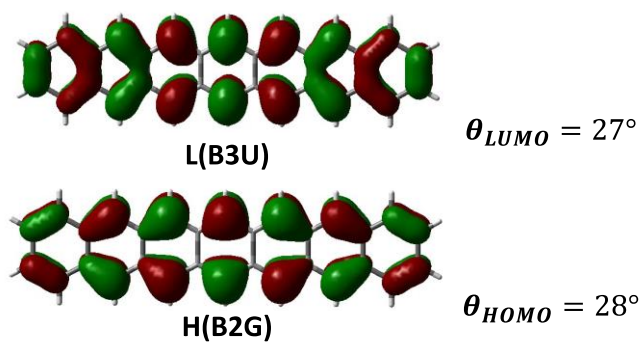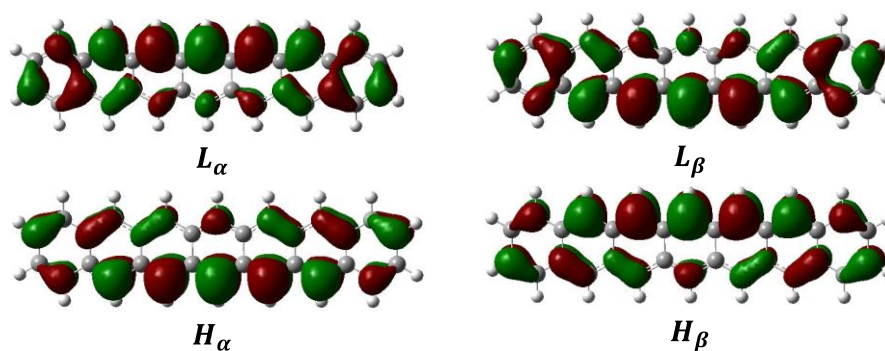

**Figure S1.** Frontier molecular orbitals of [n]-acenes. (Top) Closed-shell (CS) orbitals computed at B3LYP; (bottom) Broken-symmetry (BS) orbitals obtained at UB3LYP level. 6-31G\* basis set was used. Values of the rotation angle  $\theta$  are also reported alongside the CS orbitals. Orbital symmetries are indicated in parenthesis.

### [8]-acene

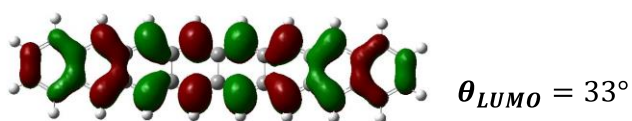

L(B1G)

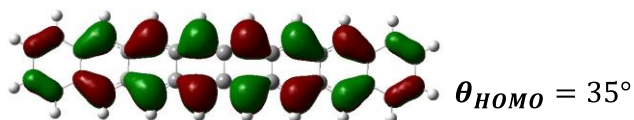

H(AU)

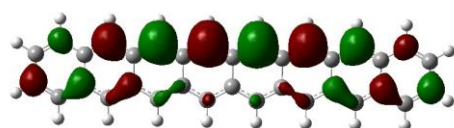

$L_\alpha$

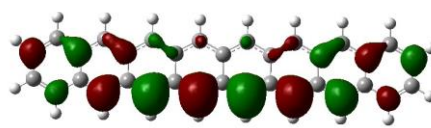

$L_\beta$

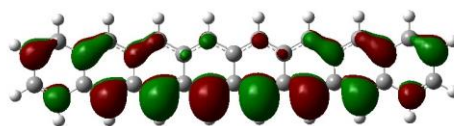

$H_\alpha$

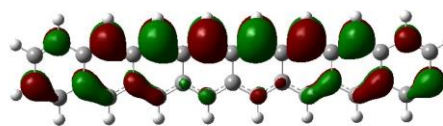

$H_\beta$

### [9]-acene

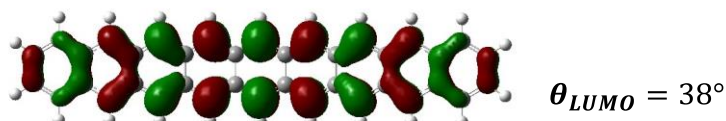

L(B3U)

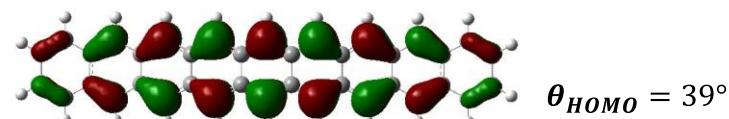

H(B2G)

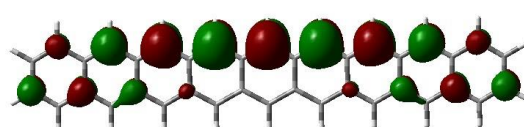

$L_\alpha$

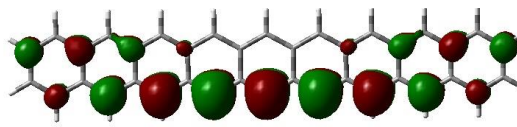

$L_\beta$

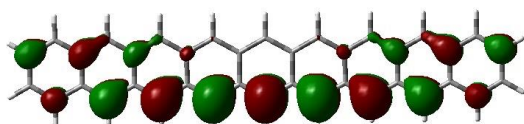

$H_\alpha$

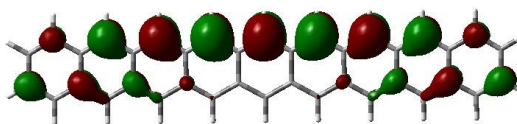

$H_\beta$

**Figure S1\_continued.** Frontier molecular orbitals of [n]-acenes. (Top) Closed-shell (CS) orbitals computed at B3LYP; (bottom) Broken-symmetry (BS) orbitals obtained at UB3LYP level. 6-31G\* basis set was used. Values of the rotation angle  $\theta$  are also reported alongside the CS orbitals. Orbital symmetries are indicated in parenthesis.

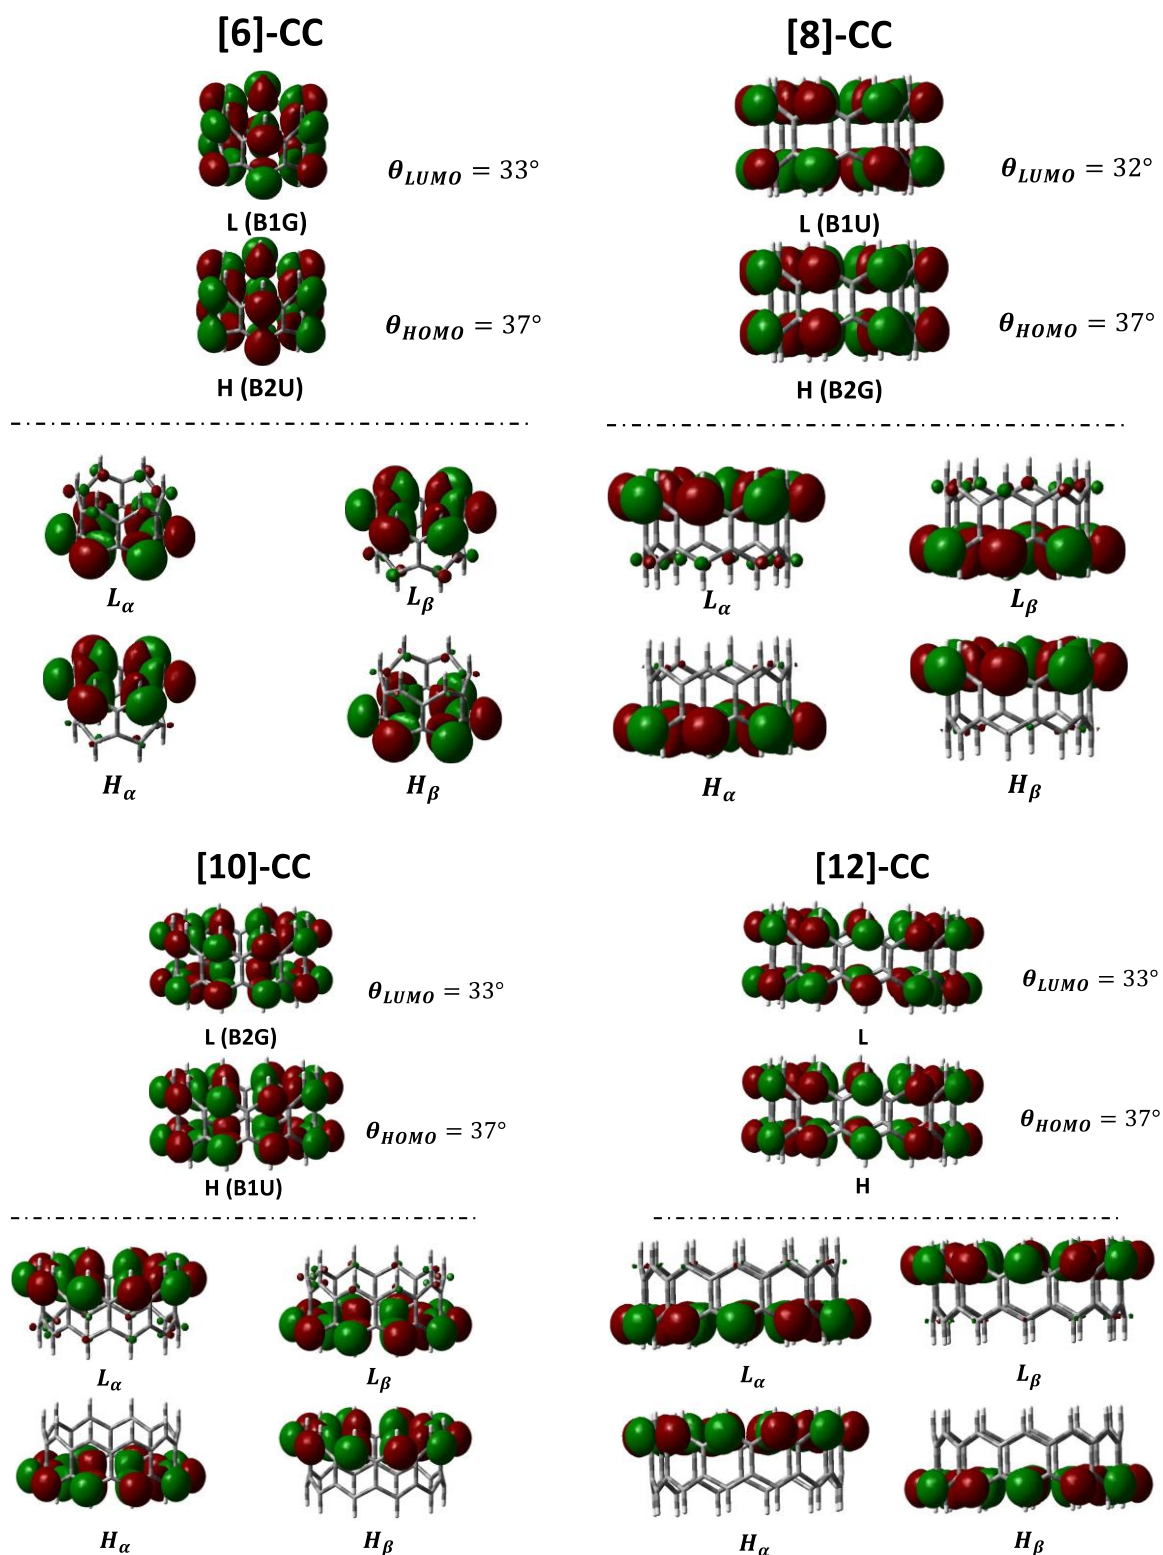

**Figure S2.** Frontier molecular orbitals of even [n]-CCs. (Top) Closed-shell (CS) orbitals computed at B3LYP; (bottom) Broken-symmetry (BS) orbitals obtained at UB3LYP level. 6-31G\* basis set was used. Values of the rotation angle  $\theta$  are also reported alongside the CS orbitals. Orbital symmetries are indicated in parenthesis.



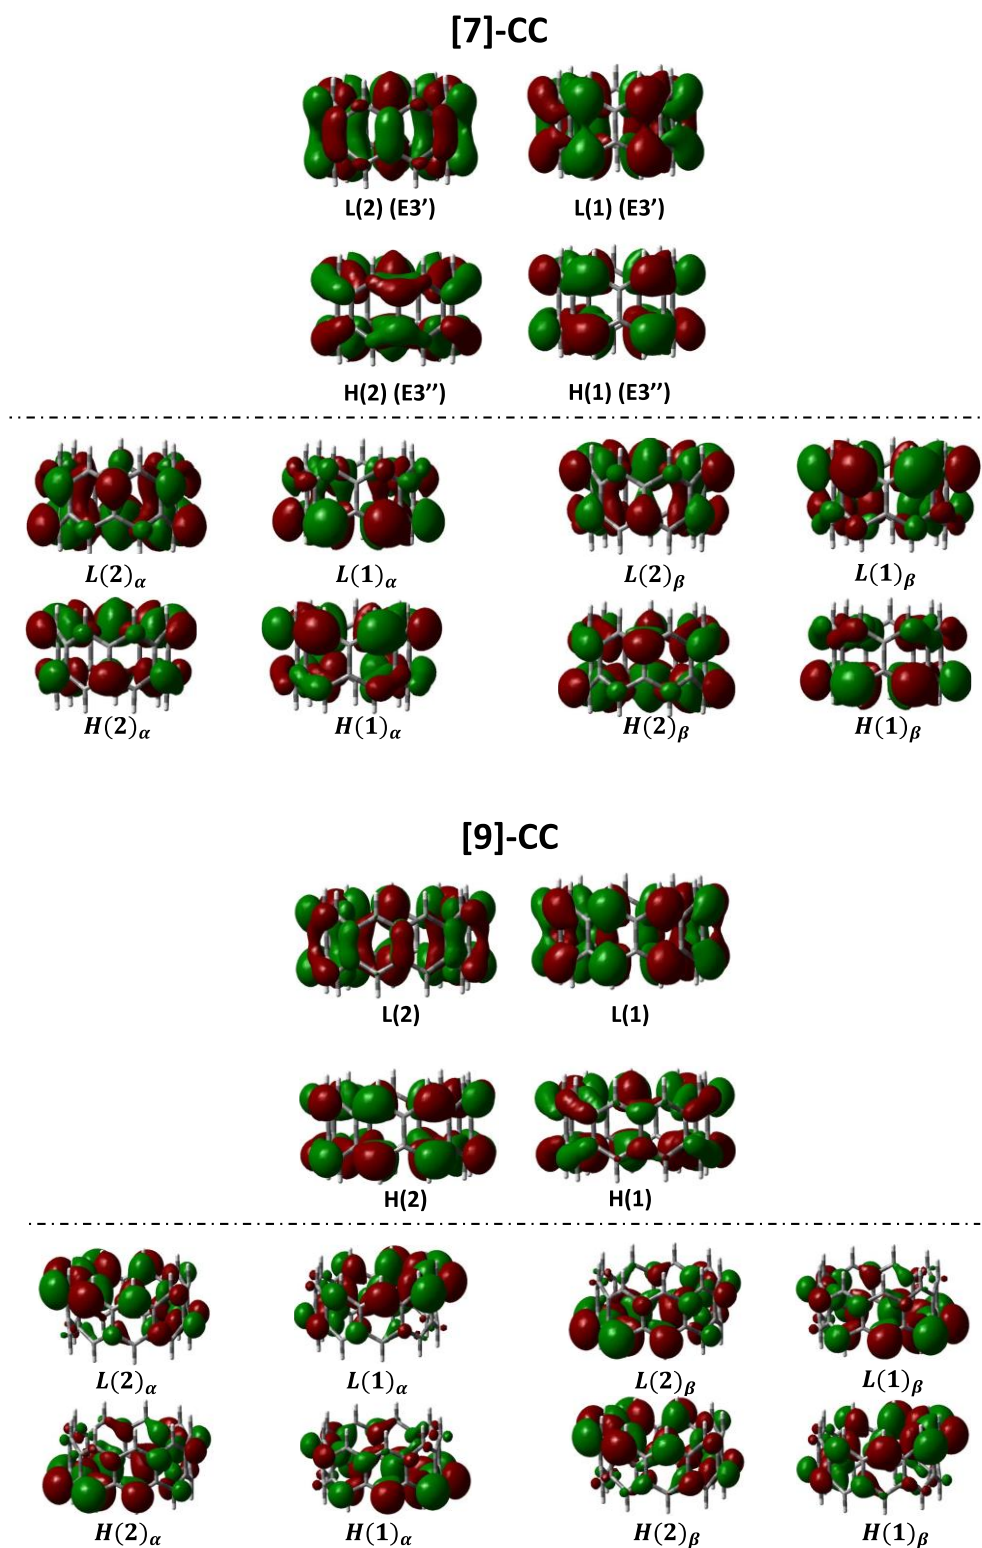

**Figure S3.** Frontier molecular orbitals of odd [n]-CCs. (Top) Closed-shell (CS) orbitals computed at B3LYP; (bottom) Broken-symmetry (BS) orbitals obtained at UB3LYP level. 6-31G\* basis set was used. Orbital symmetries are indicated in parenthesis where possible.

[11]-CC

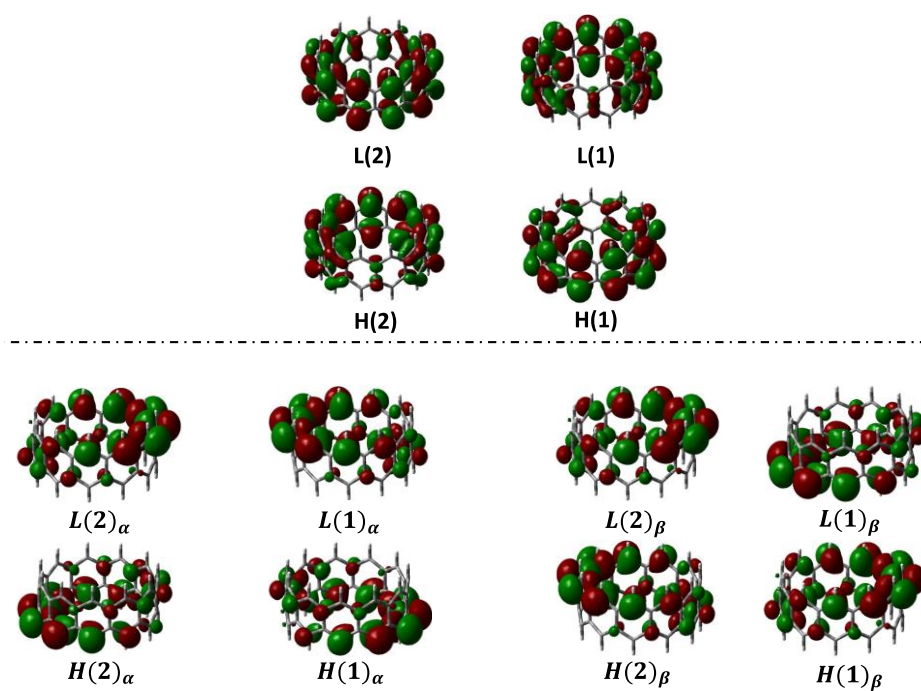

**Figure S3\_continued.** Frontier molecular orbitals of odd  $[n]$ -CCs. (Top) Closed-shell (CS) orbitals computed at B3LYP; (bottom) Broken-symmetry (BS) orbitals obtained at UB3LYP level. 6-31G\* basis set was used. Orbital symmetries are indicated in parenthesis where possible.

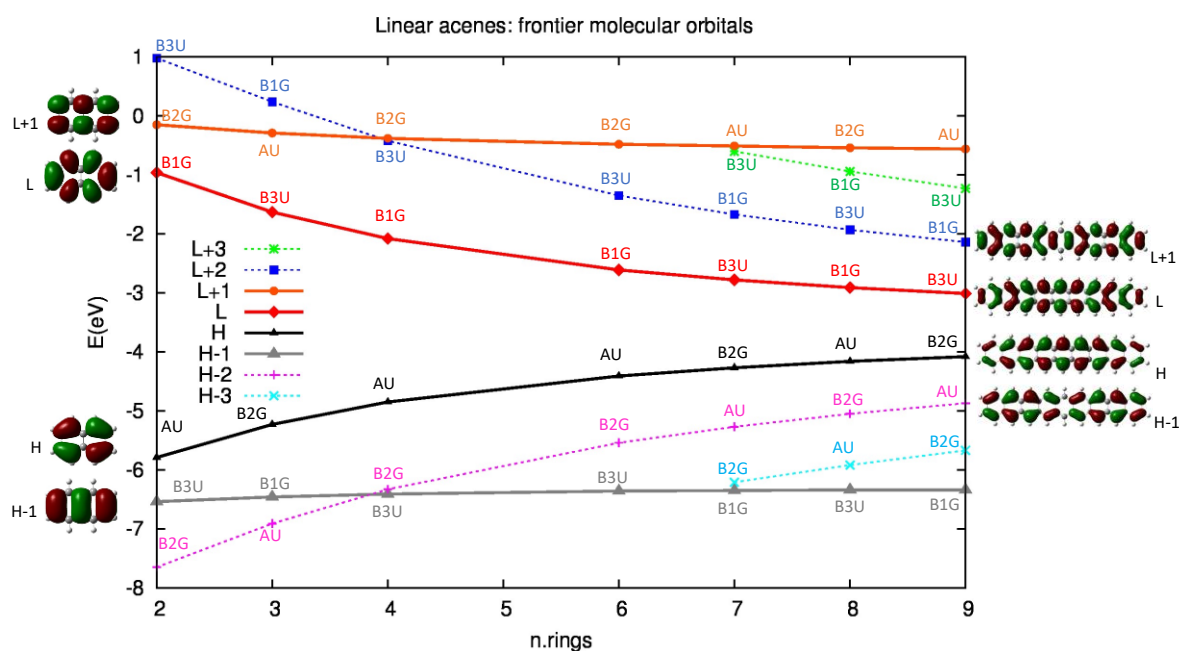

**Figure S4.** Ordering of frontier molecular orbitals (FMOs) of  $[n]$ -acenes calculated at B3LYP/6-31G\* level. Symmetries are labeled above or under the line with the same color. Left: four FMOs of naphthalene ([2]-acene); right: four FMOs of nonacene ([9]-acene).

In Figure S4, orbitals with electronic distributions similar to that of naphthalene's four frontier molecular orbitals (FMOs) are represented by solid line. Note that the switch of FMOs' order of larger acenes is mainly due to the energy decreasing of other orbitals (*e.g.* H-1 and L+1 of longer acenes) as the molecular size increases. These orbitals become more and more relevant for the description of low-lying excited states of longer acenes and in particular, for the description of the DE state, as discussed in previous work[4].

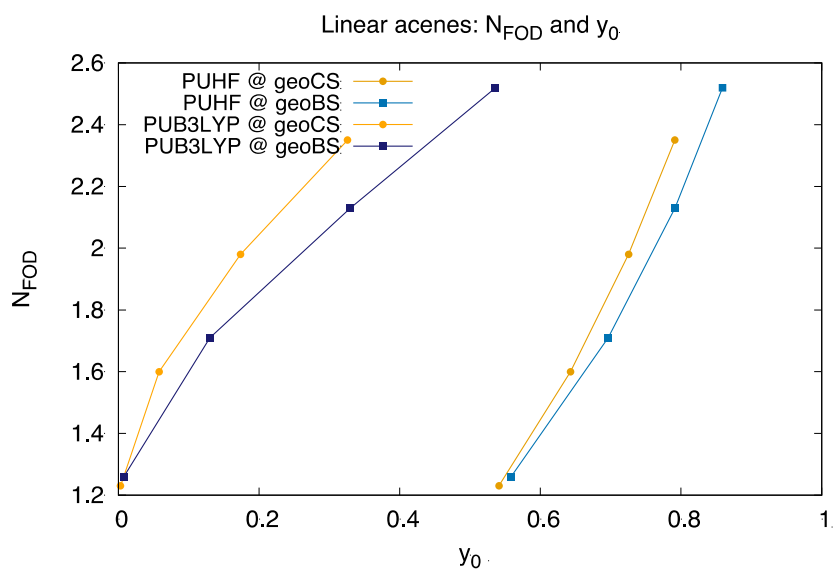

**Figure S5.** Relationship between  $N_{FOD}$  values and  $y_0$  values for **[n]-acenes**.  $y_0$  were calculated both at PUHF/6-31G\* (gold and blue lines) and PUB3LYP/6-31G\* (orange and midnight blue lines) levels. Two geometries were considered: CS-B3LYP (circles) and BS-UB3LYP (squares).

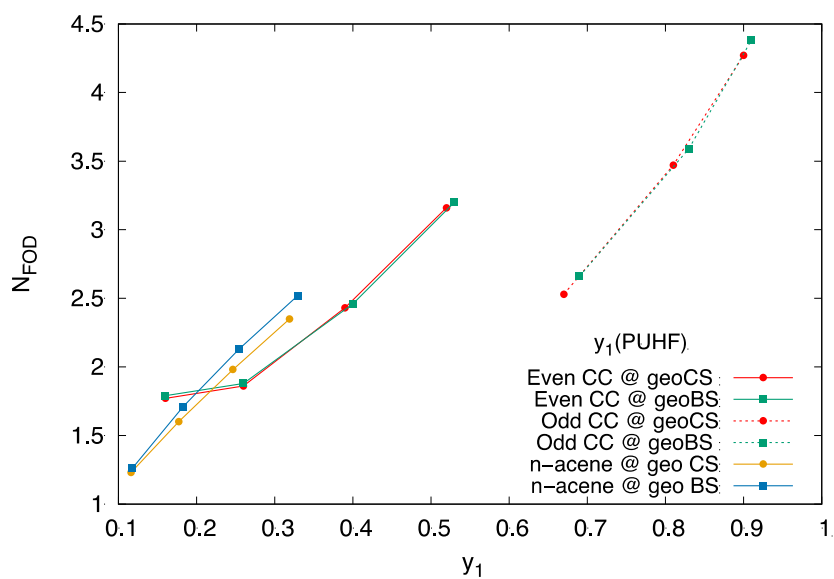

**Figure S6.** Relationship between  $N_{FOD}$  values and  $y_1^{PUHF}$  for even **[n]-CCs** (solid red and green lines), odd **[n]-CCs** (dashed red and green lines) and **[n]-acenes** (solid gold and blue lines). Two geometries were considered: CS-B3LYP (circles) and BS-UB3LYP (squares).



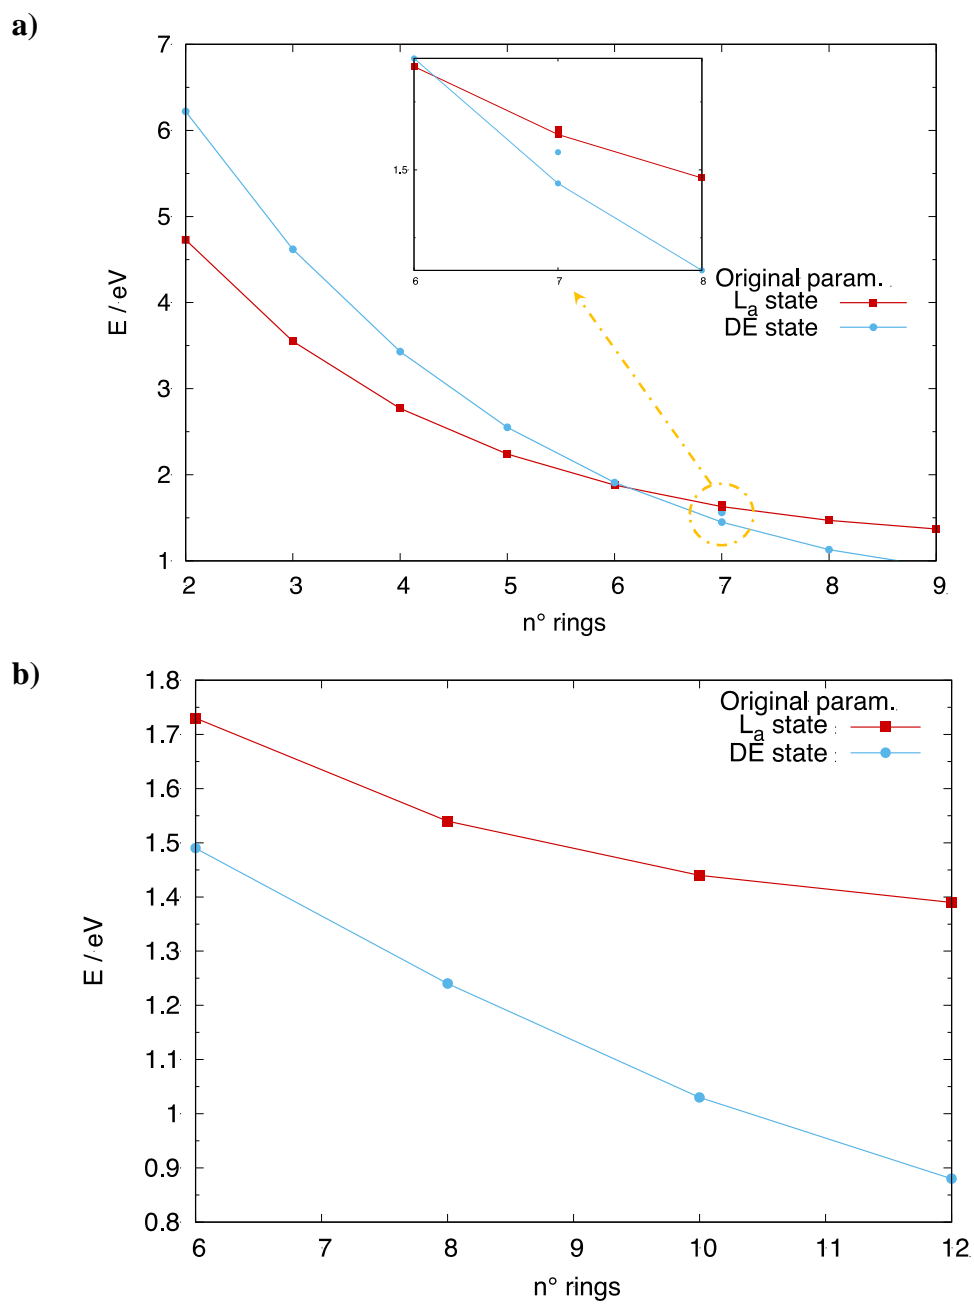

**Figure S7.** Crossing between the  $L_a$  and DE states predicted by DFT/MRCI calculations with the original parametrization: **(a)** [n]-acenes: The isolated cyan and red data points correspond to experimental data from ref. [5]; **(b)** [n]-CCs.

## References

1. Marian, C.M.; Gilka, N. Performance of the density functional theory/multireference configuration interaction method on electronic excitation of extended  $\pi$ -systems. *J. Chem. Theory Comput.* **2008**, *4*, 1501–1515, doi:10.1021/ct8001738.
2. Bettinger, H.F.; Tönshoff, C.; Doerr, M.; Sanchez-Garcia, E. Electronically Excited States of Higher Acenes up to Nonacene: A Density Functional Theory/Multireference Configuration Interaction Study. *J. Chem. Theory Comput.* **2016**, *12*, 305–312, doi:10.1021/acs.jctc.5b00671.
3. Sandoval-Salinas, M.E.; Brémond, E.; Pérez-Jiménez, A.J.; Adamo, C.; Sancho-García, J.C. Excitation energies of polycyclic aromatic hydrocarbons by double-hybrid functionals: Assessing the PBE0-DH and PBE-QIDH models and their range-separated versions. *J. Chem. Phys.* **2023**, *158*, 044105, doi:10.1063/5.0134946.
4. Yang, Y.; Davidson, E.R.; Yang, W. Nature of ground and electronic excited states of higher acenes. *Proc. Natl. Acad. Sci. U. S. A.* **2016**, *113*, E5098–E5107, doi:10.1073/pnas.1606021113.
5. Einholz, R.; Fang, T.; Berger, R.; Grüninger, P.; Früh, A.; Chassé, T.; Fink, R.F.; Bettinger, H.F. Heptacene: Characterization in Solution, in the Solid State, and in Films. *J. Am. Chem. Soc.* **2017**, *139*, 4435–4442, doi:10.1021/jacs.6b13212.
6. Grimme, S.; Parac, M. Substantial errors from time-dependent density functional theory for the calculation of excited states of large  $\pi$  systems. *ChemPhysChem* **2003**, *4*, 292–295, doi:10.1002/cphc.200390047.
7. Mondal, R.; Tönshoff, C.; Khon, D.; Neckers, D.C.; Bettinger, H.F. Synthesis, stability, and photochemistry of pentacene, hexacene, and heptacene: A matrix isolation study. *J. Am. Chem. Soc.* **2009**, *131*, 14281–14289, doi:10.1021/ja901841c.
8. Houk, K.N.; Lee, P.S.; Nendel, M. Polyacene and cyclacene geometries and electronic structures: Bond equalization, vanishing band gaps, and triplet ground states contrast with polyacetylene. *J. Org. Chem.* **2001**, *66*, 5517–5521, doi:10.1021/jo010391f.
9. Tönshoff, C.; Bettinger, H.F. Photogeneration of octacene and nonacene. *Angew. Chem. Int. Ed.* **2010**, *49*, 4125–4128, doi:10.1002/anie.200906355.
10. Bergman, A.; Jortner, J. Two-photon absorption spectra of crystalline naphthalene and of the naphthalene molecule in solution. *Chem. Phys. Lett.* **1974**, *26*, 323–326, doi:10.1016/0009-2614(74)89040-8.
11. Bergman, A.; Jortner, J. Two-photon spectroscopy utilizing dye lasers. *Chem. Phys. Lett.* **1972**, *15*, 309–315, doi:10.1016/0009-2614(72)80178-7.

## Cartesian coordinates

### [2]-acene: CS-B3LYP geometry

|   |          |           |           |
|---|----------|-----------|-----------|
| C | 0.000000 | 0.000000  | 0.717142  |
| C | 0.000000 | 0.000000  | -0.717142 |
| C | 0.000000 | 1.244511  | -1.402567 |
| C | 0.000000 | 2.433524  | -0.708529 |
| C | 0.000000 | 2.433524  | 0.708529  |
| C | 0.000000 | 1.244511  | 1.402567  |
| H | 0.000000 | 1.242065  | -2.490240 |
| H | 0.000000 | 3.377852  | -1.246300 |
| H | 0.000000 | 3.377852  | 1.246300  |
| H | 0.000000 | 1.242065  | 2.490240  |
| C | 0.000000 | -1.244511 | -1.402567 |
| C | 0.000000 | -2.433524 | -0.708529 |
| H | 0.000000 | -3.377852 | -1.246300 |
| C | 0.000000 | -2.433524 | 0.708529  |
| H | 0.000000 | -3.377852 | 1.246300  |
| C | 0.000000 | -1.244511 | 1.402567  |
| H | 0.000000 | -1.242065 | -2.490240 |
| H | 0.000000 | -1.242065 | 2.490240  |

### [3]-acene: CS-B3LYP geometry

|   |          |           |           |
|---|----------|-----------|-----------|
| C | 0.000000 | 3.660679  | 0.713146  |
| C | 0.000000 | 2.479530  | 1.407036  |
| C | 0.000000 | 1.223923  | 0.722624  |
| C | 0.000000 | 1.223923  | -0.722624 |
| C | 0.000000 | 2.479530  | -1.407036 |
| C | 0.000000 | 3.660679  | -0.713146 |
| C | 0.000000 | 0.000000  | 1.403377  |
| C | 0.000000 | 0.000000  | -1.403377 |
| C | 0.000000 | -1.223923 | -0.722624 |
| C | 0.000000 | -1.223923 | 0.722624  |
| C | 0.000000 | -2.479530 | 1.407036  |
| H | 0.000000 | -2.476865 | 2.494579  |
| C | 0.000000 | -3.660679 | 0.713146  |
| C | 0.000000 | -3.660679 | -0.713146 |
| C | 0.000000 | -2.479530 | -1.407036 |
| H | 0.000000 | 0.000000  | 2.491747  |
| H | 0.000000 | 4.607360  | 1.246657  |
| H | 0.000000 | 2.476865  | 2.494579  |
| H | 0.000000 | 2.476865  | -2.494579 |
| H | 0.000000 | 4.607360  | -1.246657 |
| H | 0.000000 | 0.000000  | -2.491747 |

|   |          |           |           |
|---|----------|-----------|-----------|
| H | 0.000000 | -4.607360 | 1.246657  |
| H | 0.000000 | -4.607360 | -1.246657 |
| H | 0.000000 | -2.476865 | -2.494579 |

#### [4]-acene: CS-B3LYP geometry

|   |          |           |           |
|---|----------|-----------|-----------|
| C | 0.000000 | 2.450756  | 0.726095  |
| C | 0.000000 | 2.450756  | -0.726095 |
| C | 0.000000 | 3.711077  | -1.409420 |
| C | 0.000000 | 4.888961  | -0.715531 |
| C | 0.000000 | 4.888961  | 0.715531  |
| C | 0.000000 | 3.711077  | 1.409420  |
| H | 0.000000 | 3.708826  | -2.496975 |
| H | 0.000000 | 5.836351  | -1.247827 |
| H | 0.000000 | 5.836351  | 1.247827  |
| H | 0.000000 | 3.708826  | 2.496975  |
| C | 0.000000 | 1.235149  | -1.406273 |
| C | 0.000000 | 0.000000  | -0.726164 |
| C | 0.000000 | 0.000000  | 0.726164  |
| C | 0.000000 | 1.235149  | 1.406273  |
| H | 0.000000 | 1.234986  | -2.494546 |
| H | 0.000000 | 1.234986  | 2.494546  |
| C | 0.000000 | -1.235149 | 1.406273  |
| C | 0.000000 | -2.450756 | 0.726095  |
| C | 0.000000 | -2.450756 | -0.726095 |
| C | 0.000000 | -1.235149 | -1.406273 |
| H | 0.000000 | -1.234986 | 2.494546  |
| H | 0.000000 | -1.234986 | -2.494546 |
| C | 0.000000 | -3.711077 | 1.409420  |
| C | 0.000000 | -4.888961 | 0.715531  |
| H | 0.000000 | -5.836351 | 1.247827  |
| C | 0.000000 | -4.888961 | -0.715531 |
| H | 0.000000 | -5.836351 | -1.247827 |
| C | 0.000000 | -3.711077 | -1.409420 |
| H | 0.000000 | -3.708826 | 2.496975  |
| H | 0.000000 | -3.708826 | -2.496975 |

#### [5]-acene: CS-B3LYP geometry

|   |          |          |           |
|---|----------|----------|-----------|
| C | 0.000000 | 3.678641 | 0.727804  |
| C | 0.000000 | 3.678641 | -0.727804 |
| C | 0.000000 | 4.941854 | -1.410435 |
| C | 0.000000 | 6.117937 | -0.716521 |
| C | 0.000000 | 6.117937 | 0.716521  |

|   |          |           |           |
|---|----------|-----------|-----------|
| C | 0.000000 | 4.941854  | 1.410435  |
| H | 0.000000 | 4.939926  | -2.497957 |
| H | 0.000000 | 7.065852  | -1.247836 |
| H | 0.000000 | 7.065852  | 1.247836  |
| H | 0.000000 | 4.939926  | 2.497957  |
| C | 0.000000 | 2.467521  | -1.407848 |
| C | 0.000000 | 1.226219  | -0.728407 |
| C | 0.000000 | 1.226219  | 0.728407  |
| C | 0.000000 | 2.467521  | 1.407848  |
| H | 0.000000 | 2.466983  | -2.496030 |
| H | 0.000000 | 2.466983  | 2.496030  |
| C | 0.000000 | 0.000000  | 1.408703  |
| C | 0.000000 | -1.226219 | 0.728407  |
| C | 0.000000 | -1.226219 | -0.728407 |
| C | 0.000000 | 0.000000  | -1.408703 |
| H | 0.000000 | 0.000000  | 2.496622  |
| H | 0.000000 | 0.000000  | -2.496622 |
| C | 0.000000 | -2.467521 | 1.407848  |
| C | 0.000000 | -3.678641 | 0.727804  |
| C | 0.000000 | -3.678641 | -0.727804 |
| C | 0.000000 | -2.467521 | -1.407848 |
| H | 0.000000 | -2.466983 | 2.496030  |
| H | 0.000000 | -2.466983 | -2.496030 |
| C | 0.000000 | -4.941854 | 1.410435  |
| C | 0.000000 | -6.117937 | 0.716521  |
| H | 0.000000 | -7.065852 | 1.247836  |
| C | 0.000000 | -6.117937 | -0.716521 |
| H | 0.000000 | -7.065852 | -1.247836 |
| C | 0.000000 | -4.941854 | -1.410435 |
| H | 0.000000 | -4.939926 | 2.497957  |
| H | 0.000000 | -4.939926 | -2.497957 |

### [6]-acene: CS-B3LYP geometry

|   |          |          |           |
|---|----------|----------|-----------|
| C | 0.000000 | 4.907374 | 0.728592  |
| C | 0.000000 | 4.907374 | -0.728592 |
| C | 0.000000 | 6.171739 | -1.411088 |
| C | 0.000000 | 7.346953 | -0.717126 |
| C | 0.000000 | 7.346953 | 0.717126  |
| C | 0.000000 | 6.171739 | 1.411088  |
| H | 0.000000 | 6.169623 | -2.498584 |
| H | 0.000000 | 8.295243 | -1.247691 |
| H | 0.000000 | 8.295243 | 1.247691  |
| H | 0.000000 | 6.169623 | 2.498584  |
| C | 0.000000 | 3.698528 | -1.408803 |

|   |          |           |           |
|---|----------|-----------|-----------|
| C | 0.000000 | 2.454423  | -0.729833 |
| C | 0.000000 | 2.454423  | 0.729833  |
| C | 0.000000 | 3.698528  | 1.408803  |
| H | 0.000000 | 3.698509  | -2.496949 |
| H | 0.000000 | 3.698509  | 2.496949  |
| C | 0.000000 | 1.232356  | 1.409788  |
| C | 0.000000 | 0.000000  | 0.730648  |
| C | 0.000000 | 0.000000  | -0.730648 |
| C | 0.000000 | 1.232356  | -1.409788 |
| H | 0.000000 | 1.232675  | 2.497822  |
| H | 0.000000 | 1.232675  | -2.497822 |
| C | 0.000000 | -1.232356 | 1.409788  |
| C | 0.000000 | -2.454423 | 0.729833  |
| C | 0.000000 | -2.454423 | -0.729833 |
| C | 0.000000 | -1.232356 | -1.409788 |
| H | 0.000000 | -1.232675 | 2.497822  |
| H | 0.000000 | -1.232675 | -2.497822 |
| C | 0.000000 | -3.698528 | 1.408803  |
| C | 0.000000 | -4.907374 | 0.728592  |
| C | 0.000000 | -4.907374 | -0.728592 |
| C | 0.000000 | -3.698528 | -1.408803 |
| H | 0.000000 | -3.698509 | 2.496949  |
| H | 0.000000 | -3.698509 | -2.496949 |
| C | 0.000000 | -6.171739 | 1.411088  |
| C | 0.000000 | -7.346953 | 0.717126  |
| H | 0.000000 | -8.295243 | 1.247691  |
| C | 0.000000 | -7.346953 | -0.717126 |
| H | 0.000000 | -8.295243 | -1.247691 |
| C | 0.000000 | -6.171739 | -1.411088 |
| H | 0.000000 | -6.169623 | 2.498584  |
| H | 0.000000 | -6.169623 | -2.498584 |

### **[6]-acene: BS-UB3LYP geometry**

|   |          |          |           |
|---|----------|----------|-----------|
| C | 0.000000 | 4.911463 | 0.727189  |
| C | 0.000000 | 4.911463 | -0.727189 |
| C | 0.000000 | 6.172948 | -1.409909 |
| C | 0.000000 | 7.350440 | -0.715865 |
| C | 0.000000 | 7.350440 | 0.715865  |
| C | 0.000000 | 6.172948 | 1.409909  |
| H | 0.000000 | 6.170501 | -2.497429 |
| H | 0.000000 | 8.298208 | -1.247287 |
| H | 0.000000 | 8.298208 | 1.247287  |
| H | 0.000000 | 6.170501 | 2.497429  |
| C | 0.000000 | 3.698483 | -1.407950 |

|   |          |           |           |
|---|----------|-----------|-----------|
| C | 0.000000 | 2.457538  | -0.729286 |
| C | 0.000000 | 2.457538  | 0.729286  |
| C | 0.000000 | 3.698483  | 1.407950  |
| H | 0.000000 | 3.698326  | -2.496151 |
| H | 0.000000 | 3.698326  | 2.496151  |
| C | 0.000000 | 1.232111  | 1.409764  |
| C | 0.000000 | 0.000000  | 0.730405  |
| C | 0.000000 | 0.000000  | -0.730405 |
| C | 0.000000 | 1.232111  | -1.409764 |
| H | 0.000000 | 1.232148  | 2.497796  |
| H | 0.000000 | 1.232148  | -2.497796 |
| C | 0.000000 | -1.232111 | 1.409764  |
| C | 0.000000 | -2.457538 | 0.729286  |
| C | 0.000000 | -2.457538 | -0.729286 |
| C | 0.000000 | -1.232111 | -1.409764 |
| H | 0.000000 | -1.232148 | 2.497796  |
| H | 0.000000 | -1.232148 | -2.497796 |
| C | 0.000000 | -3.698483 | 1.407950  |
| C | 0.000000 | -4.911463 | 0.727189  |
| C | 0.000000 | -4.911463 | -0.727189 |
| C | 0.000000 | -3.698483 | -1.407950 |
| H | 0.000000 | -3.698326 | 2.496151  |
| H | 0.000000 | -3.698326 | -2.496151 |
| C | 0.000000 | -6.172948 | 1.409909  |
| C | 0.000000 | -7.350440 | 0.715865  |
| H | 0.000000 | -8.298208 | 1.247287  |
| C | 0.000000 | -7.350440 | -0.715865 |
| H | 0.000000 | -8.298208 | -1.247287 |
| C | 0.000000 | -6.172948 | -1.409909 |
| H | 0.000000 | -6.170501 | 2.497429  |
| H | 0.000000 | -6.170501 | -2.497429 |

### [7]-acene: CS-B3LYP geometry

|   |          |          |           |
|---|----------|----------|-----------|
| C | 0.000000 | 6.136520 | 0.729112  |
| C | 0.000000 | 6.136520 | -0.729112 |
| C | 0.000000 | 7.401543 | -1.411491 |
| C | 0.000000 | 8.576302 | -0.717513 |
| C | 0.000000 | 8.576302 | 0.717513  |
| C | 0.000000 | 7.401543 | 1.411491  |
| H | 0.000000 | 7.399614 | -2.498970 |
| H | 0.000000 | 9.524678 | -1.247881 |
| H | 0.000000 | 9.524678 | 1.247881  |
| H | 0.000000 | 7.399614 | 2.498970  |
| C | 0.000000 | 4.928757 | -1.409253 |

|   |          |           |           |
|---|----------|-----------|-----------|
| C | 0.000000 | 3.683061  | -0.730602 |
| C | 0.000000 | 3.683061  | 0.730602  |
| C | 0.000000 | 4.928757  | 1.409253  |
| H | 0.000000 | 4.928927  | -2.497411 |
| H | 0.000000 | 4.928927  | 2.497411  |
| C | 0.000000 | 2.463332  | 1.410508  |
| C | 0.000000 | 1.227899  | 0.731585  |
| C | 0.000000 | 1.227899  | -0.731585 |
| C | 0.000000 | 2.463332  | -1.410508 |
| H | 0.000000 | 2.463595  | 2.498521  |
| H | 0.000000 | 2.463595  | -2.498521 |
| C | 0.000000 | 0.000000  | 1.410845  |
| C | 0.000000 | -1.227899 | 0.731585  |
| C | 0.000000 | -1.227899 | -0.731585 |
| C | 0.000000 | 0.000000  | -1.410845 |
| H | 0.000000 | 0.000000  | 2.498834  |
| H | 0.000000 | 0.000000  | -2.498834 |
| C | 0.000000 | -2.463332 | 1.410508  |
| C | 0.000000 | -3.683061 | 0.730602  |
| C | 0.000000 | -3.683061 | -0.730602 |
| C | 0.000000 | -2.463332 | -1.410508 |
| H | 0.000000 | -2.463595 | 2.498521  |
| H | 0.000000 | -2.463595 | -2.498521 |
| C | 0.000000 | -4.928757 | 1.409253  |
| C | 0.000000 | -6.136520 | 0.729112  |
| C | 0.000000 | -6.136520 | -0.729112 |
| C | 0.000000 | -4.928757 | -1.409253 |
| H | 0.000000 | -4.928927 | 2.497411  |
| H | 0.000000 | -4.928927 | -2.497411 |
| C | 0.000000 | -7.401543 | 1.411491  |
| C | 0.000000 | -8.576302 | 0.717513  |
| H | 0.000000 | -9.524678 | 1.247881  |
| C | 0.000000 | -8.576302 | -0.717513 |
| H | 0.000000 | -9.524678 | -1.247881 |
| C | 0.000000 | -7.401543 | -1.411491 |
| H | 0.000000 | -7.399614 | -2.498970 |
| H | 0.000000 | -7.399614 | 2.498970  |

### [7]-acene: BS-UB3LYP geometry

|   |          |          |           |
|---|----------|----------|-----------|
| C | 0.000000 | 6.150238 | 0.724952  |
| C | 0.000000 | 6.150238 | -0.724952 |
| C | 0.000000 | 7.407114 | -1.408013 |
| C | 0.000000 | 8.588251 | -0.713677 |
| C | 0.000000 | 8.588251 | 0.713677  |



|   |          |           |           |
|---|----------|-----------|-----------|
| C | 0.000000 | 7.407114  | 1.408013  |
| H | 0.000000 | 7.404688  | -2.495530 |
| H | 0.000000 | 9.535077  | -1.246787 |
| H | 0.000000 | 9.535077  | 1.246787  |
| H | 0.000000 | 7.404688  | 2.495530  |
| C | 0.000000 | 4.930309  | -1.406557 |
| C | 0.000000 | 3.695364  | -0.728308 |
| C | 0.000000 | 3.695364  | 0.728308  |
| C | 0.000000 | 4.930309  | 1.406557  |
| H | 0.000000 | 4.930721  | -2.494729 |
| H | 0.000000 | 4.930721  | 2.494729  |
| C | 0.000000 | 2.462903  | 1.409305  |
| C | 0.000000 | 1.232941  | 0.731128  |
| C | 0.000000 | 1.232941  | -0.731128 |
| C | 0.000000 | 2.462903  | -1.409305 |
| H | 0.000000 | 2.463500  | 2.497279  |
| H | 0.000000 | 2.463500  | -2.497279 |
| C | 0.000000 | 0.000000  | 1.410355  |
| C | 0.000000 | -1.232941 | 0.731128  |
| C | 0.000000 | -1.232941 | -0.731128 |
| C | 0.000000 | 0.000000  | -1.410355 |
| H | 0.000000 | 0.000000  | 2.498278  |
| H | 0.000000 | 0.000000  | -2.498278 |
| C | 0.000000 | -2.462903 | 1.409305  |
| C | 0.000000 | -3.695364 | 0.728308  |
| C | 0.000000 | -3.695364 | -0.728308 |
| C | 0.000000 | -2.462903 | -1.409305 |
| H | 0.000000 | -2.463500 | 2.497279  |
| H | 0.000000 | -2.463500 | -2.497279 |
| C | 0.000000 | -4.930309 | 1.406557  |
| C | 0.000000 | -6.150238 | 0.724952  |
| C | 0.000000 | -6.150238 | -0.724952 |
| C | 0.000000 | -4.930309 | -1.406557 |
| H | 0.000000 | -4.930721 | 2.494729  |
| H | 0.000000 | -4.930721 | -2.494729 |
| C | 0.000000 | -7.407114 | 1.408013  |
| C | 0.000000 | -8.588251 | 0.713677  |
| H | 0.000000 | -9.535077 | 1.246787  |
| C | 0.000000 | -8.588251 | -0.713677 |
| H | 0.000000 | -9.535077 | -1.246787 |
| C | 0.000000 | -7.407114 | -1.408013 |
| H | 0.000000 | -7.404688 | -2.495530 |
| H | 0.000000 | -7.404688 | 2.495530  |

**[8]-acene: CS-B3LYP geometry**

|   |          |            |           |
|---|----------|------------|-----------|
| C | 0.000000 | 7.366104   | 0.729405  |
| C | 0.000000 | 7.366104   | -0.729405 |
| C | 0.000000 | 9.805838   | -0.717701 |
| C | 0.000000 | 9.805838   | 0.717701  |
| C | 0.000000 | 8.631529   | 1.411638  |
| H | 0.000000 | 10.754274  | -1.247984 |
| H | 0.000000 | 10.754274  | 1.247984  |
| H | 0.000000 | 8.629626   | 2.499130  |
| C | 0.000000 | 6.158802   | -1.409500 |
| C | 0.000000 | 4.912204   | -0.731024 |
| C | 0.000000 | 4.912204   | 0.731024  |
| C | 0.000000 | 6.158802   | 1.409500  |
| H | 0.000000 | 6.158970   | -2.497649 |
| H | 0.000000 | 6.158970   | 2.497649  |
| C | 0.000000 | 3.693947   | 1.410862  |
| C | 0.000000 | 2.456747   | 0.732198  |
| C | 0.000000 | 2.456747   | -0.732198 |
| C | 0.000000 | 3.693947   | -1.410862 |
| H | 0.000000 | 3.694059   | 2.498865  |
| H | 0.000000 | 3.694059   | -2.498865 |
| C | 0.000000 | 1.231221   | 1.411425  |
| C | 0.000000 | 0.000000   | 0.732577  |
| C | 0.000000 | 0.000000   | -0.732577 |
| C | 0.000000 | 1.231221   | -1.411425 |
| H | 0.000000 | 1.231120   | 2.499399  |
| H | 0.000000 | 1.231120   | -2.499399 |
| C | 0.000000 | -1.231221  | 1.411425  |
| C | 0.000000 | -2.456747  | 0.732198  |
| C | 0.000000 | -2.456747  | -0.732198 |
| C | 0.000000 | -1.231221  | -1.411425 |
| H | 0.000000 | -1.231120  | 2.499399  |
| H | 0.000000 | -1.231120  | -2.499399 |
| C | 0.000000 | -3.693947  | 1.410862  |
| C | 0.000000 | -4.912204  | 0.731024  |
| C | 0.000000 | -4.912204  | -0.731024 |
| C | 0.000000 | -3.693947  | -1.410862 |
| H | 0.000000 | -3.694059  | 2.498865  |
| H | 0.000000 | -3.694059  | -2.498865 |
| C | 0.000000 | -6.158802  | 1.409500  |
| C | 0.000000 | -7.366104  | 0.729405  |
| C | 0.000000 | -7.366104  | -0.729405 |
| C | 0.000000 | -6.158802  | -1.409500 |
| H | 0.000000 | -6.158970  | -2.497649 |
| H | 0.000000 | -6.158970  | 2.497649  |
| C | 0.000000 | -8.631529  | -1.411638 |
| C | 0.000000 | -9.805838  | -0.717701 |
| H | 0.000000 | -10.754274 | -1.247984 |

|   |          |            |           |
|---|----------|------------|-----------|
| C | 0.000000 | -9.805838  | 0.717701  |
| H | 0.000000 | -10.754274 | 1.247984  |
| C | 0.000000 | -8.631529  | 1.411638  |
| H | 0.000000 | -8.629626  | -2.499130 |
| H | 0.000000 | -8.629626  | 2.499130  |
| C | 0.000000 | 8.631529   | -1.411638 |
| H | 0.000000 | 8.629626   | -2.499130 |

### **[8]-acene: BS-UB3LYP geometry**

|   |          |           |           |
|---|----------|-----------|-----------|
| C | 0.000000 | 7.384600  | 0.724225  |
| C | 0.000000 | 7.384600  | -0.724225 |
| C | 0.000000 | 9.822225  | -0.713110 |
| C | 0.000000 | 9.822225  | 0.713110  |
| C | 0.000000 | 8.640213  | 1.407485  |
| H | 0.000000 | 10.768840 | -1.246594 |
| H | 0.000000 | 10.768840 | 1.246594  |
| H | 0.000000 | 8.637682  | 2.495005  |
| C | 0.000000 | 6.162609  | -1.405958 |
| C | 0.000000 | 4.930212  | -0.727590 |
| C | 0.000000 | 4.930212  | 0.727590  |
| C | 0.000000 | 6.162609  | 1.405958  |
| H | 0.000000 | 6.162929  | -2.494143 |
| H | 0.000000 | 6.162929  | 2.494143  |
| C | 0.000000 | 3.694197  | 1.408669  |
| C | 0.000000 | 2.467774  | 0.730752  |
| C | 0.000000 | 2.467774  | -0.730752 |
| C | 0.000000 | 3.694197  | -1.408669 |
| H | 0.000000 | 3.694762  | 2.496668  |
| H | 0.000000 | 3.694762  | -2.496668 |
| C | 0.000000 | 1.230787  | 1.409989  |
| C | 0.000000 | 0.000000  | 0.731843  |
| C | 0.000000 | 0.000000  | -0.731843 |
| C | 0.000000 | 1.230787  | -1.409989 |
| H | 0.000000 | 1.230962  | 2.497928  |
| H | 0.000000 | 1.230962  | -2.497928 |
| C | 0.000000 | -1.230787 | 1.409989  |
| C | 0.000000 | -2.467774 | 0.730752  |
| C | 0.000000 | -2.467774 | -0.730752 |
| C | 0.000000 | -1.230787 | -1.409989 |
| H | 0.000000 | -1.230962 | 2.497928  |
| H | 0.000000 | -1.230962 | -2.497928 |
| C | 0.000000 | -3.694197 | 1.408669  |
| C | 0.000000 | -4.930212 | 0.727590  |
| C | 0.000000 | -4.930212 | -0.727590 |
| C | 0.000000 | -3.694197 | -1.408669 |

|   |          |            |           |
|---|----------|------------|-----------|
| H | 0.000000 | -3.694762  | 2.496668  |
| H | 0.000000 | -3.694762  | -2.496668 |
| C | 0.000000 | -6.162609  | 1.405958  |
| C | 0.000000 | -7.384600  | 0.724225  |
| C | 0.000000 | -7.384600  | -0.724225 |
| C | 0.000000 | -6.162609  | -1.405958 |
| H | 0.000000 | -6.162929  | -2.494143 |
| H | 0.000000 | -6.162929  | 2.494143  |
| C | 0.000000 | -8.640213  | -1.407485 |
| C | 0.000000 | -9.822225  | -0.713110 |
| H | 0.000000 | -10.768840 | -1.246594 |
| C | 0.000000 | -9.822225  | 0.713110  |
| H | 0.000000 | -10.768840 | 1.246594  |
| C | 0.000000 | -8.640213  | 1.407485  |
| H | 0.000000 | -8.637682  | -2.495005 |
| H | 0.000000 | -8.637682  | 2.495005  |
| C | 0.000000 | 8.640213   | -1.407485 |
| H | 0.000000 | 8.637682   | -2.495005 |

### [9]-acene: CS-B3LYP geometry

|   |          |           |           |
|---|----------|-----------|-----------|
| C | 0.000000 | 6.141286  | 0.731266  |
| C | 0.000000 | 6.141286  | -0.731266 |
| C | 0.000000 | 8.595146  | -0.729743 |
| C | 0.000000 | 8.595146  | 0.729743  |
| C | 0.000000 | 7.388434  | 1.409718  |
| H | 0.000000 | 7.388614  | 2.497875  |
| C | 0.000000 | 4.923646  | -1.411168 |
| C | 0.000000 | 3.685499  | -0.732579 |
| C | 0.000000 | 3.685499  | 0.732579  |
| C | 0.000000 | 4.923646  | 1.411168  |
| H | 0.000000 | 4.923911  | -2.499149 |
| H | 0.000000 | 4.923911  | 2.499149  |
| C | 0.000000 | 2.461374  | 1.411808  |
| C | 0.000000 | 1.228570  | 0.733068  |
| C | 0.000000 | 1.228570  | -0.733068 |
| C | 0.000000 | 2.461374  | -1.411808 |
| H | 0.000000 | 2.461411  | 2.499762  |
| H | 0.000000 | 2.461411  | -2.499762 |
| C | 0.000000 | 0.000000  | 1.412085  |
| C | 0.000000 | -1.228570 | 0.733068  |
| C | 0.000000 | -1.228570 | -0.733068 |
| C | 0.000000 | 0.000000  | -1.412085 |
| H | 0.000000 | 0.000000  | 2.500017  |
| H | 0.000000 | 0.000000  | -2.500017 |
| C | 0.000000 | -2.461374 | 1.411808  |

|   |          |            |           |
|---|----------|------------|-----------|
| C | 0.000000 | -3.685499  | 0.732579  |
| C | 0.000000 | -3.685499  | -0.732579 |
| C | 0.000000 | -2.461374  | -1.411808 |
| H | 0.000000 | -2.461411  | 2.499762  |
| H | 0.000000 | -2.461411  | -2.499762 |
| C | 0.000000 | -4.923646  | 1.411168  |
| C | 0.000000 | -6.141286  | 0.731266  |
| C | 0.000000 | -6.141286  | -0.731266 |
| C | 0.000000 | -4.923646  | -1.411168 |
| H | 0.000000 | -4.923911  | 2.499149  |
| H | 0.000000 | -4.923911  | -2.499149 |
| C | 0.000000 | -7.388434  | 1.409718  |
| C | 0.000000 | -8.595146  | 0.729743  |
| C | 0.000000 | -8.595146  | -0.729743 |
| C | 0.000000 | -7.388434  | -1.409718 |
| H | 0.000000 | -7.388614  | -2.497875 |
| H | 0.000000 | -7.388614  | 2.497875  |
| C | 0.000000 | -9.860861  | -1.411905 |
| C | 0.000000 | -11.035072 | -0.717839 |
| H | 0.000000 | -11.983705 | -1.247717 |
| C | 0.000000 | -11.035072 | 0.717839  |
| H | 0.000000 | -11.983705 | 1.247717  |
| C | 0.000000 | -9.860861  | 1.411905  |
| H | 0.000000 | -9.859005  | -2.499383 |
| H | 0.000000 | -9.859005  | 2.499383  |
| C | 0.000000 | 7.388434   | -1.409718 |
| H | 0.000000 | 7.388614   | -2.497875 |
| C | 0.000000 | 9.860861   | -1.411905 |
| C | 0.000000 | 11.035072  | -0.717839 |
| H | 0.000000 | 11.983705  | -1.247717 |
| C | 0.000000 | 11.035072  | 0.717839  |
| H | 0.000000 | 11.983705  | 1.247717  |
| C | 0.000000 | 9.860861   | 1.411905  |
| H | 0.000000 | 9.859005   | 2.499383  |
| H | 0.000000 | 9.859005   | -2.499383 |

### [9]-acene: BS-UB3LYP geometry

|   |          |          |           |
|---|----------|----------|-----------|
| C | 0.000000 | 6.163081 | 0.727294  |
| C | 0.000000 | 6.163081 | -0.727294 |
| C | 0.000000 | 8.617012 | -0.724113 |
| C | 0.000000 | 8.617012 | 0.724113  |
| C | 0.000000 | 7.394864 | 1.405807  |
| H | 0.000000 | 7.395092 | 2.493997  |
| C | 0.000000 | 4.925998 | -1.408333 |

|   |          |            |           |
|---|----------|------------|-----------|
| C | 0.000000 | 3.701540   | -0.730328 |
| C | 0.000000 | 3.701540   | 0.730328  |
| C | 0.000000 | 4.925998   | 1.408333  |
| H | 0.000000 | 4.926420   | -2.496352 |
| H | 0.000000 | 4.926420   | 2.496352  |
| C | 0.000000 | 2.461835   | 1.409527  |
| C | 0.000000 | 1.234448   | 0.731690  |
| C | 0.000000 | 1.234448   | -0.731690 |
| C | 0.000000 | 2.461835   | -1.409527 |
| H | 0.000000 | 2.461930   | 2.497499  |
| H | 0.000000 | 2.461930   | -2.497499 |
| C | 0.000000 | 0.000000   | 1.409760  |
| C | 0.000000 | -1.234448  | 0.731690  |
| C | 0.000000 | -1.234448  | -0.731690 |
| C | 0.000000 | 0.000000   | -1.409760 |
| H | 0.000000 | 0.000000   | 2.497723  |
| H | 0.000000 | 0.000000   | -2.497723 |
| C | 0.000000 | -2.461835  | 1.409527  |
| C | 0.000000 | -3.701540  | 0.730328  |
| C | 0.000000 | -3.701540  | -0.730328 |
| C | 0.000000 | -2.461835  | -1.409527 |
| H | 0.000000 | -2.461930  | 2.497499  |
| H | 0.000000 | -2.461930  | -2.497499 |
| C | 0.000000 | -4.925998  | 1.408333  |
| C | 0.000000 | -6.163081  | 0.727294  |
| C | 0.000000 | -6.163081  | -0.727294 |
| C | 0.000000 | -4.925998  | -1.408333 |
| H | 0.000000 | -4.926420  | 2.496352  |
| H | 0.000000 | -4.926420  | -2.496352 |
| C | 0.000000 | -7.394864  | 1.405807  |
| C | 0.000000 | -8.617012  | 0.724113  |
| C | 0.000000 | -8.617012  | -0.724113 |
| C | 0.000000 | -7.394864  | -1.405807 |
| H | 0.000000 | -7.395092  | -2.493997 |
| H | 0.000000 | -7.395092  | 2.493997  |
| C | 0.000000 | -9.872578  | -1.407452 |
| C | 0.000000 | -11.054548 | -0.713100 |
| H | 0.000000 | -12.001164 | -1.246583 |
| C | 0.000000 | -11.054548 | 0.713100  |
| H | 0.000000 | -12.001164 | 1.246583  |
| C | 0.000000 | -9.872578  | 1.407452  |
| H | 0.000000 | -9.870003  | -2.494972 |
| H | 0.000000 | -9.870003  | 2.494972  |
| C | 0.000000 | 7.394864   | -1.405807 |
| H | 0.000000 | 7.395092   | -2.493997 |
| C | 0.000000 | 9.872578   | -1.407452 |
| C | 0.000000 | 11.054548  | -0.713100 |

|   |          |           |           |
|---|----------|-----------|-----------|
| H | 0.000000 | 12.001164 | -1.246583 |
| C | 0.000000 | 11.054548 | 0.713100  |
| H | 0.000000 | 12.001164 | 1.246583  |
| C | 0.000000 | 9.872578  | 1.407452  |
| H | 0.000000 | 9.870003  | 2.494972  |
| H | 0.000000 | 9.870003  | -2.494972 |

### [6]-CC: CS-B3LYP geometry

|   |           |           |           |
|---|-----------|-----------|-----------|
| C | 1.209261  | 2.094520  | 1.401665  |
| C | 2.420053  | 0.000000  | 1.401617  |
| C | 1.209261  | -2.094520 | 1.401665  |
| C | -1.209261 | -2.094520 | 1.401665  |
| C | -2.420053 | 0.000000  | 1.401617  |
| C | -1.209261 | 2.094520  | 1.401665  |
| H | 1.193833  | -2.067962 | 2.489381  |
| H | 2.389591  | 0.000000  | 2.489316  |
| H | 1.193833  | 2.067962  | 2.489381  |
| H | -1.193833 | 2.067962  | 2.489381  |
| H | -1.193833 | -2.067962 | 2.489381  |
| H | -2.389591 | 0.000000  | 2.489316  |
| C | -2.076106 | 1.198537  | 0.725811  |
| C | 0.000000  | 2.398270  | 0.725726  |
| C | 2.076106  | 1.198537  | 0.725811  |
| C | 2.076106  | -1.198537 | 0.725811  |
| C | 0.000000  | -2.398270 | 0.725726  |
| C | -2.076106 | -1.198537 | 0.725811  |
| C | 0.000000  | 2.398270  | -0.725726 |
| C | 2.076106  | 1.198537  | -0.725811 |
| C | -2.076106 | 1.198537  | -0.725811 |
| C | 0.000000  | -2.398270 | -0.725726 |
| C | -2.076106 | -1.198537 | -0.725811 |
| C | 2.076106  | -1.198537 | -0.725811 |
| H | 1.193833  | 2.067962  | -2.489381 |
| H | 1.193833  | -2.067962 | -2.489381 |
| H | -2.389591 | 0.000000  | -2.489316 |
| H | -1.193833 | 2.067962  | -2.489381 |
| H | 2.389591  | 0.000000  | -2.489316 |
| H | -1.193833 | -2.067962 | -2.489381 |
| C | 1.209261  | 2.094520  | -1.401665 |
| C | 2.420053  | 0.000000  | -1.401617 |
| C | 1.209261  | -2.094520 | -1.401665 |
| C | -1.209261 | -2.094520 | -1.401665 |
| C | -2.420053 | 0.000000  | -1.401617 |
| C | -1.209261 | 2.094520  | -1.401665 |

### [6]-CC: BS-UB3LYP geometry

|   |           |           |           |
|---|-----------|-----------|-----------|
| C | 1.209552  | 2.094944  | 1.405402  |
| C | 2.420720  | 0.000000  | 1.405383  |
| C | 1.209552  | -2.094944 | 1.405402  |
| C | -1.209552 | -2.094944 | 1.405402  |
| C | -2.420720 | 0.000000  | 1.405383  |
| C | -1.209552 | 2.094944  | 1.405402  |
| H | 1.190539  | -2.062128 | 2.492709  |
| H | 2.383078  | 0.000000  | 2.492675  |
| H | 1.190539  | 2.062128  | 2.492709  |
| H | -1.190539 | 2.062128  | 2.492709  |
| H | -1.190539 | -2.062128 | 2.492709  |
| H | -2.383078 | 0.000000  | 2.492675  |
| C | -2.079879 | 1.200687  | 0.725754  |
| C | 0.000000  | 2.402481  | 0.725677  |
| C | 2.079879  | 1.200687  | 0.725754  |
| C | 2.079879  | -1.200687 | 0.725754  |
| C | 0.000000  | -2.402481 | 0.725677  |
| C | -2.079879 | -1.200687 | 0.725754  |
| C | 0.000000  | 2.402481  | -0.725677 |
| C | 2.079879  | 1.200687  | -0.725754 |
| C | -2.079879 | 1.200687  | -0.725754 |
| C | 0.000000  | -2.402481 | -0.725677 |
| C | -2.079879 | -1.200687 | -0.725754 |
| C | 2.079879  | -1.200687 | -0.725754 |
| H | 1.190539  | 2.062128  | -2.492709 |
| H | 1.190539  | -2.062128 | -2.492709 |
| H | -2.383078 | 0.000000  | -2.492675 |
| H | -1.190539 | 2.062128  | -2.492709 |
| H | 2.383078  | 0.000000  | -2.492675 |
| H | -1.190539 | -2.062128 | -2.492709 |
| C | 1.209552  | 2.094944  | -1.405402 |
| C | 2.420720  | 0.000000  | -1.405383 |
| C | 1.209552  | -2.094944 | -1.405402 |
| C | -1.209552 | -2.094944 | -1.405402 |
| C | -2.420720 | 0.000000  | -1.405383 |
| C | -1.209552 | 2.094944  | -1.405402 |

### [8]-CC: CS-B3LYP geometry

|   |           |           |          |
|---|-----------|-----------|----------|
| C | -1.217587 | 2.939516  | 1.406307 |
| C | -2.939516 | 1.217587  | 1.406307 |
| C | -2.939516 | -1.217587 | 1.406307 |
| C | -1.217587 | -2.939516 | 1.406307 |
| C | 1.217587  | -2.939516 | 1.406307 |



|   |           |           |           |
|---|-----------|-----------|-----------|
| C | 2.939516  | -1.217587 | 1.406307  |
| C | 2.939516  | 1.217587  | 1.406307  |
| C | 1.217587  | 2.939516  | 1.406307  |
| H | 2.914510  | -1.207230 | 2.494030  |
| H | 1.207230  | -2.914510 | 2.494030  |
| H | -1.207230 | -2.914510 | 2.494030  |
| H | -2.914510 | -1.207230 | 2.494030  |
| H | -2.914510 | 1.207230  | 2.494030  |
| H | -1.207230 | 2.914510  | 2.494030  |
| H | 1.207230  | 2.914510  | 2.494030  |
| H | 2.914510  | 1.207230  | 2.494030  |
| C | 0.000000  | 3.165955  | 0.729611  |
| C | -2.238668 | 2.238668  | 0.729611  |
| C | -3.165955 | 0.000000  | 0.729611  |
| C | -2.238668 | -2.238668 | 0.729611  |
| C | 0.000000  | -3.165955 | 0.729611  |
| C | 2.238668  | -2.238668 | 0.729611  |
| C | 3.165955  | 0.000000  | 0.729611  |
| C | 2.238668  | 2.238668  | 0.729611  |
| C | -2.238668 | 2.238668  | -0.729611 |
| C | 0.000000  | 3.165955  | -0.729611 |
| C | -3.165955 | 0.000000  | -0.729611 |
| C | 2.238668  | 2.238668  | -0.729611 |
| C | 3.165955  | 0.000000  | -0.729611 |
| C | 2.238668  | -2.238668 | -0.729611 |
| C | 0.000000  | -3.165955 | -0.729611 |
| C | -2.238668 | -2.238668 | -0.729611 |
| H | 2.914510  | -1.207230 | -2.494030 |
| H | 1.207230  | -2.914510 | -2.494030 |
| H | -1.207230 | -2.914510 | -2.494030 |
| H | -2.914510 | -1.207230 | -2.494030 |
| H | -2.914510 | 1.207230  | -2.494030 |
| H | -1.207230 | 2.914510  | -2.494030 |
| H | 1.207230  | 2.914510  | -2.494030 |
| H | 2.914510  | 1.207230  | -2.494030 |
| C | -1.217587 | 2.939516  | -1.406307 |
| C | -2.939516 | 1.217587  | -1.406307 |
| C | -2.939516 | -1.217587 | -1.406307 |
| C | -1.217587 | -2.939516 | -1.406307 |
| C | 1.217587  | -2.939516 | -1.406307 |
| C | 1.217587  | 2.939516  | -1.406307 |
| C | 2.939516  | -1.217587 | -1.406307 |
| C | 2.939516  | 1.217587  | -1.406307 |

**[8]-CC: BS-UB3LYP geometry**

|   |           |           |           |
|---|-----------|-----------|-----------|
| C | 2.813541  | 1.489001  | 1.408487  |
| C | 0.936536  | 3.042448  | 1.408467  |
| C | -1.489007 | 2.813556  | 1.408450  |
| C | -3.042454 | 0.936552  | 1.408444  |
| C | -2.813562 | -1.488991 | 1.408455  |
| C | -0.936558 | -3.042438 | 1.408474  |
| C | 1.488985  | -2.813547 | 1.408492  |
| C | 3.042433  | -0.936542 | 1.408497  |
| H | -0.927146 | -3.012441 | 2.496010  |
| H | -2.786125 | -1.474453 | 2.495980  |
| H | -3.012469 | 0.927136  | 2.495980  |
| H | -1.474480 | 2.786115  | 2.495975  |
| H | 0.927108  | 3.012458  | 2.496003  |
| H | 2.786087  | 1.474470  | 2.496012  |
| H | 3.012431  | -0.927119 | 2.496033  |
| H | 1.474442  | -2.786097 | 2.496017  |
| C | 3.155879  | 0.297753  | 0.729025  |
| C | 2.020809  | 2.441755  | 0.729034  |
| C | -0.297756 | 3.155887  | 0.728988  |
| C | -2.441758 | 2.020817  | 0.729001  |
| C | -3.155890 | -0.297748 | 0.728978  |
| C | -2.020820 | -2.441750 | 0.729020  |
| C | 0.297745  | -3.155882 | 0.729015  |
| C | 2.441747  | -2.020812 | 0.729053  |
| C | 2.020820  | 2.441750  | -0.729020 |
| C | 3.155890  | 0.297748  | -0.728978 |
| C | -0.297745 | 3.155882  | -0.729015 |
| C | 2.441758  | -2.020817 | -0.729001 |
| C | 0.297756  | -3.155887 | -0.728988 |
| C | -2.020809 | -2.441755 | -0.729034 |
| C | -3.155879 | -0.297753 | -0.729025 |
| C | -2.441747 | 2.020812  | -0.729053 |
| H | -0.927108 | -3.012458 | -2.496003 |
| H | -2.786087 | -1.474470 | -2.496012 |
| H | -3.012431 | 0.927119  | -2.496033 |
| H | -1.474442 | 2.786097  | -2.496017 |
| H | 0.927146  | 3.012441  | -2.496010 |
| H | 2.786125  | 1.474453  | -2.495980 |
| H | 3.012469  | -0.927136 | -2.495980 |
| H | 1.474480  | -2.786115 | -2.495975 |
| C | 2.813562  | 1.488991  | -1.408455 |
| C | 0.936558  | 3.042438  | -1.408474 |
| C | -1.488985 | 2.813547  | -1.408492 |
| C | -3.042433 | 0.936542  | -1.408497 |
| C | -2.813541 | -1.489001 | -1.408487 |
| C | 3.042454  | -0.936552 | -1.408444 |
| C | -0.936536 | -3.042448 | -1.408467 |

|   |          |           |           |
|---|----------|-----------|-----------|
| C | 1.489007 | -2.813556 | -1.408450 |
|---|----------|-----------|-----------|

**[10]-CC: CS-B3LYP geometry**

|   |           |           |           |
|---|-----------|-----------|-----------|
| C | -1.221591 | 3.759672  | 1.408255  |
| C | 1.221591  | 3.759672  | 1.408255  |
| C | 3.198168  | 2.323605  | 1.408255  |
| C | 3.953153  | 0.000000  | 1.408255  |
| C | 3.198168  | -2.323605 | 1.408255  |
| C | 1.221591  | -3.759672 | 1.408255  |
| C | -1.221591 | -3.759672 | 1.408255  |
| C | -3.198168 | -2.323605 | 1.408255  |
| C | -3.953153 | 0.000000  | 1.408255  |
| C | -3.198168 | 2.323605  | 1.408255  |
| H | 3.929807  | 0.000000  | 2.496071  |
| H | 3.179280  | -2.309882 | 2.496071  |
| H | 1.214377  | -3.737468 | 2.496071  |
| H | 1.214377  | 3.737468  | 2.496071  |
| H | -1.214377 | 3.737468  | 2.496071  |
| H | -3.179280 | 2.309882  | 2.496071  |
| H | -3.929807 | 0.000000  | 2.496071  |
| H | -3.179280 | -2.309882 | 2.496071  |
| H | -1.214377 | -3.737468 | 2.496071  |
| H | 3.179280  | 2.309882  | 2.496071  |
| C | 0.000000  | 3.940483  | 0.731560  |
| C | 2.316158  | 3.187918  | 0.731560  |
| C | 3.747622  | 1.217676  | 0.731560  |
| C | 3.747622  | -1.217676 | 0.731560  |
| C | 2.316158  | -3.187918 | 0.731560  |
| C | 0.000000  | -3.940483 | 0.731560  |
| C | -2.316158 | -3.187918 | 0.731560  |
| C | -3.747622 | -1.217676 | 0.731560  |
| C | -3.747622 | 1.217676  | 0.731560  |
| C | -2.316158 | 3.187918  | 0.731560  |
| C | 0.000000  | 3.940483  | -0.731560 |
| C | 2.316158  | 3.187918  | -0.731560 |
| C | 3.747622  | -1.217676 | -0.731560 |
| C | 2.316158  | -3.187918 | -0.731560 |
| C | 0.000000  | -3.940483 | -0.731560 |
| C | -2.316158 | -3.187918 | -0.731560 |
| C | -3.747622 | -1.217676 | -0.731560 |
| C | -3.747622 | 1.217676  | -0.731560 |
| C | -2.316158 | 3.187918  | -0.731560 |
| C | 3.747622  | 1.217676  | -0.731560 |
| H | 1.214377  | -3.737468 | -2.496071 |

|   |           |           |           |
|---|-----------|-----------|-----------|
| H | 3.179280  | -2.309882 | -2.496071 |
| H | 3.929807  | 0.000000  | -2.496071 |
| H | 3.179280  | 2.309882  | -2.496071 |
| H | 1.214377  | 3.737468  | -2.496071 |
| H | -1.214377 | 3.737468  | -2.496071 |
| H | -3.179280 | 2.309882  | -2.496071 |
| H | -3.929807 | 0.000000  | -2.496071 |
| H | -3.179280 | -2.309882 | -2.496071 |
| H | -1.214377 | -3.737468 | -2.496071 |
| C | 1.221591  | 3.759672  | -1.408255 |
| C | -1.221591 | 3.759672  | -1.408255 |
| C | -3.198168 | 2.323605  | -1.408255 |
| C | -3.953153 | 0.000000  | -1.408255 |
| C | -3.198168 | -2.323605 | -1.408255 |
| C | -1.221591 | -3.759672 | -1.408255 |
| C | 1.221591  | -3.759672 | -1.408255 |
| C | 3.198168  | -2.323605 | -1.408255 |
| C | 3.953153  | 0.000000  | -1.408255 |
| C | 3.198168  | 2.323605  | -1.408255 |

#### [10]-CC: BS-UB3LYP geometry

|   |           |           |          |
|---|-----------|-----------|----------|
| C | -1.223125 | 3.764391  | 1.409384 |
| C | 1.223125  | 3.764391  | 1.409384 |
| C | 3.202182  | 2.326522  | 1.409384 |
| C | 3.958115  | 0.000000  | 1.409384 |
| C | 3.202182  | -2.326522 | 1.409384 |
| C | 1.223125  | -3.764391 | 1.409384 |
| C | -1.223125 | -3.764391 | 1.409384 |
| C | -3.202182 | -2.326522 | 1.409384 |
| C | -3.958115 | 0.000000  | 1.409384 |
| C | -3.202182 | 2.326522  | 1.409384 |
| H | 3.929875  | 0.000000  | 2.497162 |
| H | 3.179336  | -2.309923 | 2.497162 |
| H | 1.214398  | -3.737533 | 2.497162 |
| H | 1.214398  | 3.737533  | 2.497162 |
| H | -1.214398 | 3.737533  | 2.497162 |
| H | -3.179336 | 2.309923  | 2.497162 |
| H | -3.929875 | 0.000000  | 2.497162 |
| H | -3.179336 | -2.309923 | 2.497162 |
| H | -1.214398 | -3.737533 | 2.497162 |
| H | 3.179336  | 2.309923  | 2.497162 |
| C | 0.000000  | 3.947327  | 0.730175 |
| C | 2.320180  | 3.193454  | 0.730175 |
| C | 3.754131  | 1.219791  | 0.730175 |
| C | 3.754131  | -1.219791 | 0.730175 |

|   |           |           |           |
|---|-----------|-----------|-----------|
| C | 2.320180  | -3.193454 | 0.730175  |
| C | 0.000000  | -3.947327 | 0.730175  |
| C | -2.320180 | -3.193454 | 0.730175  |
| C | -3.754131 | -1.219791 | 0.730175  |
| C | -3.754131 | 1.219791  | 0.730175  |
| C | -2.320180 | 3.193454  | 0.730175  |
| C | 0.000000  | 3.947327  | -0.730175 |
| C | 2.320180  | 3.193454  | -0.730175 |
| C | 3.754131  | -1.219791 | -0.730175 |
| C | 2.320180  | -3.193454 | -0.730175 |
| C | 0.000000  | -3.947327 | -0.730175 |
| C | -2.320180 | -3.193454 | -0.730175 |
| C | -3.754131 | -1.219791 | -0.730175 |
| C | -3.754131 | 1.219791  | -0.730175 |
| C | -2.320180 | 3.193454  | -0.730175 |
| C | 3.754131  | 1.219791  | -0.730175 |
| H | 1.214398  | -3.737533 | -2.497162 |
| H | 3.179336  | -2.309923 | -2.497162 |
| H | 3.929875  | 0.000000  | -2.497162 |
| H | 3.179336  | 2.309923  | -2.497162 |
| H | 1.214398  | 3.737533  | -2.497162 |
| H | -1.214398 | 3.737533  | -2.497162 |
| H | -3.179336 | 2.309923  | -2.497162 |
| H | -3.929875 | 0.000000  | -2.497162 |
| H | -3.179336 | -2.309923 | -2.497162 |
| H | -1.214398 | -3.737533 | -2.497162 |
| C | 1.223125  | 3.764391  | -1.409384 |
| C | -1.223125 | 3.764391  | -1.409384 |
| C | -3.202182 | 2.326522  | -1.409384 |
| C | -3.958115 | 0.000000  | -1.409384 |
| C | -3.202182 | -2.326522 | -1.409384 |
| C | -1.223125 | -3.764391 | -1.409384 |
| C | 1.223125  | -3.764391 | -1.409384 |
| C | 3.202182  | -2.326522 | -1.409384 |
| C | 3.958115  | 0.000000  | -1.409384 |
| C | 3.202182  | 2.326522  | -1.409384 |

## [12]-CC: CS-B3LYP geometry

|   |           |           |          |
|---|-----------|-----------|----------|
| C | -2.918352 | -3.721341 | 1.409514 |
| C | -0.666614 | -4.681303 | 1.409509 |
| C | 1.763514  | -4.387544 | 1.409457 |
| C | 3.721340  | -2.918352 | 1.409514 |
| C | 4.681302  | -0.666614 | 1.409509 |
| C | 4.387543  | 1.763515  | 1.409457 |

|   |           |           |           |
|---|-----------|-----------|-----------|
| C | 2.918352  | 3.721341  | 1.409514  |
| C | 0.666614  | 4.681304  | 1.409509  |
| C | -1.763514 | 4.387544  | 1.409457  |
| C | -3.721340 | 2.918353  | 1.409514  |
| C | -4.681302 | 0.666614  | 1.409509  |
| C | -4.387543 | -1.763514 | 1.409457  |
| H | -4.368110 | -1.755576 | 2.497237  |
| H | -4.368110 | -1.755576 | -2.497237 |
| H | -4.660051 | 0.663522  | -2.497277 |
| H | -4.660051 | 0.663522  | 2.497277  |
| H | -3.704755 | 2.905423  | 2.497307  |
| H | -3.704755 | 2.905423  | -2.497307 |
| H | -1.755576 | 4.368111  | -2.497237 |
| H | -1.755576 | 4.368111  | 2.497237  |
| H | 0.663522  | 4.660053  | 2.497277  |
| H | 0.663522  | 4.660053  | -2.497277 |
| H | 2.905423  | 3.704756  | -2.497307 |
| H | 2.905423  | 3.704756  | 2.497307  |
| C | -3.773571 | -2.833017 | 0.732611  |
| C | -1.851656 | -4.340217 | 0.732659  |
| C | 0.566525  | -4.684099 | 0.732609  |
| C | 2.833016  | -3.773572 | 0.732611  |
| C | 4.340216  | -1.851657 | 0.732659  |
| C | 4.684097  | 0.566525  | 0.732609  |
| C | 3.773571  | 2.833016  | 0.732611  |
| C | 1.851656  | 4.340217  | 0.732659  |
| C | -0.566526 | 4.684098  | 0.732609  |
| C | -2.833016 | 3.773571  | 0.732611  |
| C | -4.340216 | 1.851656  | 0.732659  |
| C | -4.684097 | -0.566526 | 0.732609  |
| C | -3.773571 | -2.833017 | -0.732611 |
| C | -1.851656 | -4.340217 | -0.732659 |
| C | 0.566525  | -4.684099 | -0.732609 |
| C | 2.833016  | -3.773572 | -0.732611 |
| C | 4.340216  | -1.851657 | -0.732659 |
| C | 4.684097  | 0.566525  | -0.732609 |
| C | 3.773571  | 2.833016  | -0.732611 |
| C | 1.851656  | 4.340217  | -0.732659 |
| C | -0.566526 | 4.684098  | -0.732609 |
| C | -4.340216 | 1.851656  | -0.732659 |
| C | -4.684097 | -0.566526 | -0.732609 |
| C | -2.918352 | -3.721341 | -1.409514 |
| H | 4.368110  | 1.755576  | 2.497237  |
| H | 4.368110  | 1.755576  | -2.497237 |
| H | 4.660051  | -0.663522 | -2.497277 |
| H | 4.660051  | -0.663522 | 2.497277  |
| H | 3.704754  | -2.905423 | 2.497307  |

|   |           |           |           |
|---|-----------|-----------|-----------|
| H | 3.704754  | -2.905423 | -2.497307 |
| H | 1.755575  | -4.368111 | -2.497237 |
| H | 1.755575  | -4.368111 | 2.497237  |
| H | -0.663522 | -4.660052 | 2.497277  |
| H | -0.663522 | -4.660052 | -2.497277 |
| H | -2.905422 | -3.704755 | -2.497307 |
| H | -2.905422 | -3.704755 | 2.497307  |
| C | -0.666614 | -4.681303 | -1.409509 |
| C | 1.763514  | -4.387544 | -1.409457 |
| C | 3.721340  | -2.918352 | -1.409514 |
| C | 4.681302  | -0.666614 | -1.409509 |
| C | 4.387543  | 1.763515  | -1.409457 |
| C | 2.918352  | 3.721341  | -1.409514 |
| C | 0.666614  | 4.681304  | -1.409509 |
| C | -1.763514 | 4.387544  | -1.409457 |
| C | -3.721340 | 2.918353  | -1.409514 |
| C | -4.681302 | 0.666614  | -1.409509 |
| C | -4.387543 | -1.763514 | -1.409457 |
| C | -2.833016 | 3.773571  | -0.732611 |

## [12]-CC: BS-UB3LYP geometry

|   |           |           |           |
|---|-----------|-----------|-----------|
| C | -3.801498 | 2.825403  | 1.409411  |
| C | -4.704085 | 0.545966  | 1.409433  |
| C | -4.347228 | -1.879485 | 1.409363  |
| C | -2.825403 | -3.801498 | 1.409411  |
| C | -0.545966 | -4.704086 | 1.409433  |
| C | 1.879485  | -4.347229 | 1.409363  |
| C | 3.801498  | -2.825403 | 1.409411  |
| C | 4.704085  | -0.545966 | 1.409433  |
| C | 4.347228  | 1.879485  | 1.409363  |
| C | 2.825403  | 3.801498  | 1.409411  |
| C | 0.545966  | 4.704086  | 1.409433  |
| C | -1.879485 | 4.347228  | 1.409363  |
| H | -1.870797 | 4.327188  | 2.497210  |
| H | -1.870797 | 4.327188  | -2.497210 |
| H | 0.543352  | 4.681853  | -2.497274 |
| H | 0.543352  | 4.681853  | 2.497274  |
| H | 2.812114  | 3.783539  | 2.497243  |
| H | 2.812114  | 3.783539  | -2.497243 |
| H | 4.327187  | 1.870796  | -2.497210 |
| H | 4.327187  | 1.870796  | 2.497210  |
| H | 4.681852  | -0.543352 | 2.497274  |
| H | 4.681852  | -0.543352 | -2.497274 |
| H | 3.783538  | -2.812114 | -2.497243 |

|   |           |           |           |
|---|-----------|-----------|-----------|
| H | 3.783538  | -2.812114 | 2.497243  |
| C | -2.934853 | 3.705458  | 0.730236  |
| C | -4.394232 | 1.741682  | 0.730271  |
| C | -4.675575 | -0.688783 | 0.730195  |
| C | -3.705457 | -2.934853 | 0.730236  |
| C | -1.741683 | -4.394233 | 0.730271  |
| C | 0.688783  | -4.675576 | 0.730195  |
| C | 2.934853  | -3.705458 | 0.730236  |
| C | 4.394232  | -1.741682 | 0.730271  |
| C | 4.675575  | 0.688783  | 0.730195  |
| C | 3.705457  | 2.934853  | 0.730236  |
| C | 1.741682  | 4.394233  | 0.730271  |
| C | -0.688783 | 4.675576  | 0.730195  |
| C | -2.934853 | 3.705458  | -0.730236 |
| C | -4.394232 | 1.741682  | -0.730271 |
| C | -4.675575 | -0.688783 | -0.730195 |
| C | -3.705457 | -2.934853 | -0.730236 |
| C | -1.741683 | -4.394233 | -0.730271 |
| C | 0.688783  | -4.675576 | -0.730195 |
| C | 2.934853  | -3.705458 | -0.730236 |
| C | 4.394232  | -1.741682 | -0.730271 |
| C | 4.675575  | 0.688783  | -0.730195 |
| C | 1.741682  | 4.394233  | -0.730271 |
| C | -0.688783 | 4.675576  | -0.730195 |
| C | -3.801498 | 2.825403  | -1.409411 |
| H | 1.870797  | -4.327188 | 2.497210  |
| H | 1.870797  | -4.327188 | -2.497210 |
| H | -0.543353 | -4.681853 | -2.497274 |
| H | -0.543353 | -4.681853 | 2.497274  |
| H | -2.812114 | -3.783538 | 2.497243  |
| H | -2.812114 | -3.783538 | -2.497243 |
| H | -4.327187 | -1.870796 | -2.497210 |
| H | -4.327187 | -1.870796 | 2.497210  |
| H | -4.681852 | 0.543352  | 2.497274  |
| H | -4.681852 | 0.543352  | -2.497274 |
| H | -3.783538 | 2.812114  | -2.497243 |
| H | -3.783538 | 2.812114  | 2.497243  |
| C | -4.704085 | 0.545966  | -1.409433 |
| C | -4.347228 | -1.879485 | -1.409363 |
| C | -2.825403 | -3.801498 | -1.409411 |
| C | -0.545966 | -4.704086 | -1.409433 |
| C | 1.879485  | -4.347229 | -1.409363 |
| C | 3.801498  | -2.825403 | -1.409411 |
| C | 4.704085  | -0.545966 | -1.409433 |
| C | 4.347228  | 1.879485  | -1.409363 |
| C | 2.825403  | 3.801498  | -1.409411 |
| C | 0.545966  | 4.704086  | -1.409433 |



|   |           |          |           |
|---|-----------|----------|-----------|
| C | -1.879485 | 4.347228 | -1.409363 |
| C | 3.705457  | 2.934853 | -0.730236 |

# **[7]-CC: CS-B3LYP geometry**

|   |           |           |           |
|---|-----------|-----------|-----------|
| C | -1.209240 | 2.511012  | 1.416254  |
| C | 1.209240  | 2.511012  | 1.416254  |
| C | 2.717137  | 0.620169  | 1.416254  |
| C | 2.178975  | -1.737674 | 1.416254  |
| C | 0.000000  | -2.787013 | 1.416254  |
| C | -2.178975 | -1.737674 | 1.416254  |
| C | -2.717137 | 0.620169  | 1.416254  |
| H | -1.188326 | 2.467584  | 2.502733  |
| H | 1.188326  | 2.467584  | 2.502733  |
| H | 2.670144  | 0.609443  | 2.502733  |
| H | 2.141289  | -1.707621 | 2.502733  |
| H | 0.000000  | -2.738812 | 2.502733  |
| H | -2.670144 | 0.609443  | 2.502733  |
| H | -2.141289 | -1.707621 | 2.502733  |
| C | 0.000000  | 2.778829  | 0.735536  |
| C | 2.172576  | 1.732572  | 0.735536  |
| C | 2.709158  | -0.618348 | 0.735536  |
| C | 1.205689  | -2.503639 | 0.735536  |
| C | -2.172576 | 1.732572  | 0.735536  |
| C | -1.205689 | -2.503639 | 0.735536  |
| C | -2.709158 | -0.618348 | 0.735536  |
| C | -2.172576 | 1.732572  | -0.735536 |
| C | -2.709158 | -0.618348 | -0.735536 |
| C | -1.205689 | -2.503639 | -0.735536 |
| C | 1.205689  | -2.503639 | -0.735536 |
| C | 2.709158  | -0.618348 | -0.735536 |
| C | 2.172576  | 1.732572  | -0.735536 |
| C | 0.000000  | 2.778829  | -0.735536 |
| H | -2.670144 | 0.609443  | -2.502733 |
| H | -2.141289 | -1.707621 | -2.502733 |
| H | 0.000000  | -2.738812 | -2.502733 |
| H | 2.141289  | -1.707621 | -2.502733 |
| H | 2.670144  | 0.609443  | -2.502733 |
| H | 1.188326  | 2.467584  | -2.502733 |
| H | -1.188326 | 2.467584  | -2.502733 |
| C | 1.209240  | 2.511012  | -1.416254 |
| C | -1.209240 | 2.511012  | -1.416254 |
| C | 2.717137  | 0.620169  | -1.416254 |
| C | 2.178975  | -1.737674 | -1.416254 |
| C | 0.000000  | -2.787013 | -1.416254 |
| C | -2.178975 | -1.737674 | -1.416254 |

|   |           |          |           |
|---|-----------|----------|-----------|
| C | -2.717137 | 0.620169 | -1.416254 |
|---|-----------|----------|-----------|

**[7]-CC: BS-UB3LYP geometry**

|   |           |           |           |
|---|-----------|-----------|-----------|
| C | -1.215008 | 1.410028  | -2.523473 |
| C | 1.215008  | 1.410028  | -2.523473 |
| C | 2.729773  | 1.410072  | -0.623081 |
| C | 2.189356  | 1.410068  | 1.746349  |
| C | 0.000000  | 1.409970  | 2.800731  |
| C | -2.189356 | 1.410068  | 1.746349  |
| C | -2.729773 | 1.410072  | -0.623081 |
| H | -1.198102 | 2.497351  | -2.488212 |
| H | 1.198102  | 2.497351  | -2.488212 |
| H | 2.691890  | 2.497424  | -0.614210 |
| H | 2.158488  | 2.497394  | 1.721968  |
| H | 0.000000  | 2.497242  | 2.760595  |
| H | -2.691890 | 2.497424  | -0.614210 |
| H | -2.158488 | 2.497394  | 1.721968  |
| C | 0.000000  | 0.728855  | -2.787838 |
| C | 2.178649  | 0.728879  | -1.737782 |
| C | 2.716891  | 0.728919  | 0.620178  |
| C | 1.209349  | 0.728836  | 2.511389  |
| C | -2.178649 | 0.728879  | -1.737782 |
| C | -1.209349 | 0.728836  | 2.511389  |
| C | -2.716891 | 0.728919  | 0.620178  |
| C | -2.178649 | -0.728879 | -1.737782 |
| C | -2.716891 | -0.728919 | 0.620178  |
| C | -1.209349 | -0.728836 | 2.511389  |
| C | 1.209349  | -0.728836 | 2.511389  |
| C | 2.716891  | -0.728919 | 0.620178  |
| C | 2.178649  | -0.728879 | -1.737782 |
| C | 0.000000  | -0.728855 | -2.787838 |
| H | -2.691890 | -2.497424 | -0.614210 |
| H | -2.158488 | -2.497394 | 1.721968  |
| H | 0.000000  | -2.497242 | 2.760595  |
| H | 2.158488  | -2.497394 | 1.721968  |
| H | 2.691890  | -2.497424 | -0.614210 |
| H | 1.198102  | -2.497351 | -2.488212 |
| H | -1.198102 | -2.497351 | -2.488212 |
| C | 1.215008  | -1.410028 | -2.523473 |
| C | -1.215008 | -1.410028 | -2.523473 |
| C | 2.729773  | -1.410072 | -0.623081 |
| C | 2.189356  | -1.410068 | 1.746349  |
| C | 0.000000  | -1.409970 | 2.800731  |
| C | -2.189356 | -1.410068 | 1.746349  |
| C | -2.729773 | -1.410072 | -0.623081 |

### [9]-CC: CS-B3LYP geometry

|   |           |           |           |
|---|-----------|-----------|-----------|
| C | 3.082242  | 1.415510  | -1.779707 |
| C | 3.504874  | 1.415489  | 0.618031  |
| C | 2.287824  | 1.415560  | 2.726705  |
| C | 0.000000  | 1.415609  | 3.559799  |
| C | -2.287824 | 1.415560  | 2.726705  |
| C | -3.504874 | 1.415489  | 0.618031  |
| C | -3.082242 | 1.415510  | -1.779707 |
| C | -1.217382 | 1.415538  | -3.345138 |
| C | 1.217382  | 1.415538  | -3.345138 |
| H | -3.047903 | 2.502340  | -1.759909 |
| H | -3.466083 | 2.502345  | 0.611262  |
| H | -2.262551 | 2.502424  | 2.696638  |
| H | 0.000000  | 2.502436  | 3.520245  |
| H | 2.262551  | 2.502424  | 2.696638  |
| H | 3.466083  | 2.502345  | 0.611262  |
| H | 3.047903  | 2.502340  | -1.759909 |
| H | 1.203936  | 2.502406  | -3.308620 |
| H | -1.203936 | 2.502406  | -3.308620 |
| C | 0.000000  | 0.734815  | -3.552829 |
| C | 2.283519  | 0.734847  | -2.721590 |
| C | 3.498377  | 0.734830  | -0.616888 |
| C | 1.215042  | 0.734844  | 3.338909  |
| C | 3.076141  | 0.734804  | 1.776277  |
| C | -1.215042 | 0.734844  | 3.338909  |
| C | -3.076141 | 0.734804  | 1.776277  |
| C | -3.498377 | 0.734830  | -0.616888 |
| C | -2.283519 | 0.734847  | -2.721590 |
| C | 0.000000  | -0.734815 | -3.552829 |
| C | 2.283519  | -0.734847 | -2.721590 |
| C | 3.498377  | -0.734830 | -0.616888 |
| C | 3.076141  | -0.734804 | 1.776277  |
| C | 1.215042  | -0.734844 | 3.338909  |
| C | -1.215042 | -0.734844 | 3.338909  |
| C | -3.076141 | -0.734804 | 1.776277  |
| C | -3.498377 | -0.734830 | -0.616888 |
| C | -2.283519 | -0.734847 | -2.721590 |
| H | -3.047903 | -2.502340 | -1.759909 |
| H | -3.466083 | -2.502345 | 0.611262  |
| H | -2.262551 | -2.502424 | 2.696638  |
| H | 1.203936  | -2.502406 | -3.308620 |
| H | 3.047903  | -2.502340 | -1.759909 |

|   |           |           |           |
|---|-----------|-----------|-----------|
| H | 3.466083  | -2.502345 | 0.611262  |
| H | 2.262551  | -2.502424 | 2.696638  |
| H | 0.000000  | -2.502436 | 3.520245  |
| H | -1.203936 | -2.502406 | -3.308620 |
| C | 1.217382  | -1.415538 | -3.345138 |
| C | 3.082242  | -1.415510 | -1.779707 |
| C | 3.504874  | -1.415489 | 0.618031  |
| C | 2.287824  | -1.415560 | 2.726705  |
| C | -2.287824 | -1.415560 | 2.726705  |
| C | -3.504874 | -1.415489 | 0.618031  |
| C | -3.082242 | -1.415510 | -1.779707 |
| C | -1.217382 | -1.415538 | -3.345138 |
| C | 0.000000  | -1.415609 | 3.559799  |

### [9]-CC: BS-UB3LYP geometry

|   |           |           |           |
|---|-----------|-----------|-----------|
| C | 3.095168  | 1.408715  | -1.787072 |
| C | 3.519570  | 1.408694  | 0.620619  |
| C | 2.297355  | 1.408755  | 2.738005  |
| C | 0.000000  | 1.408815  | 3.574520  |
| C | -2.297355 | 1.408755  | 2.738005  |
| C | -3.519570 | 1.408694  | 0.620619  |
| C | -3.095168 | 1.408715  | -1.787072 |
| C | -1.222441 | 1.408710  | -3.358900 |
| C | 1.222441  | 1.408710  | -3.358900 |
| H | -3.069455 | 2.496380  | -1.772284 |
| H | -3.490647 | 2.496382  | 0.615542  |
| H | -2.278552 | 2.496456  | 2.715523  |
| H | 0.000000  | 2.496478  | 3.544836  |
| H | 2.278552  | 2.496456  | 2.715523  |
| H | 3.490647  | 2.496382  | 0.615542  |
| H | 3.069455  | 2.496380  | -1.772284 |
| H | 1.212291  | 2.496410  | -3.331598 |
| H | -1.212291 | 2.496410  | -3.331598 |
| C | 0.000000  | 0.728211  | -3.562188 |
| C | 2.289625  | 0.728257  | -2.728791 |
| C | 3.507827  | 0.728229  | -0.618564 |
| C | 1.218273  | 0.728288  | 3.347671  |
| C | 3.084377  | 0.728212  | 1.780933  |
| C | -1.218273 | 0.728288  | 3.347671  |
| C | -3.084377 | 0.728212  | 1.780933  |
| C | -3.507827 | 0.728229  | -0.618564 |
| C | -2.289625 | 0.728257  | -2.728791 |
| C | 0.000000  | -0.728211 | -3.562188 |
| C | 2.289625  | -0.728257 | -2.728791 |
| C | 3.507827  | -0.728229 | -0.618564 |

|   |           |           |           |
|---|-----------|-----------|-----------|
| C | 3.084377  | -0.728212 | 1.780933  |
| C | 1.218273  | -0.728288 | 3.347671  |
| C | -1.218273 | -0.728288 | 3.347671  |
| C | -3.084377 | -0.728212 | 1.780933  |
| C | -3.507827 | -0.728229 | -0.618564 |
| C | -2.289625 | -0.728257 | -2.728791 |
| H | -3.069455 | -2.496380 | -1.772284 |
| H | -3.490647 | -2.496382 | 0.615542  |
| H | -2.278552 | -2.496456 | 2.715523  |
| H | 1.212291  | -2.496410 | -3.331598 |
| H | 3.069455  | -2.496380 | -1.772284 |
| H | 3.490647  | -2.496382 | 0.615542  |
| H | 2.278552  | -2.496456 | 2.715523  |
| H | 0.000000  | -2.496478 | 3.544836  |
| H | -1.212291 | -2.496410 | -3.331598 |
| C | 1.222441  | -1.408710 | -3.358900 |
| C | 3.095168  | -1.408715 | -1.787072 |
| C | 3.519570  | -1.408694 | 0.620619  |
| C | 2.297355  | -1.408755 | 2.738005  |
| C | -2.297355 | -1.408755 | 2.738005  |
| C | -3.519570 | -1.408694 | 0.620619  |
| C | -3.095168 | -1.408715 | -1.787072 |
| C | -1.222441 | -1.408710 | -3.358900 |
| C | 0.000000  | -1.408815 | 3.574520  |

# **[11]-CC: CS-B3LYP geometry**

|   |           |           |           |
|---|-----------|-----------|-----------|
| C | 3.646198  | -2.344261 | 1.414989  |
| C | 4.333772  | 0.000000  | 1.414979  |
| C | 3.646198  | 2.344261  | 1.414989  |
| C | 1.800964  | 3.945392  | 1.414936  |
| C | -0.617066 | 4.293459  | 1.415005  |
| C | -2.838712 | 3.277333  | 1.415032  |
| C | -4.158397 | 1.221509  | 1.414985  |
| C | -4.158397 | -1.221509 | 1.414985  |
| C | -2.838712 | -3.277333 | 1.415032  |
| C | -0.617066 | -4.293459 | 1.415005  |
| C | 1.800964  | -3.945392 | 1.414936  |
| H | 1.787221  | -3.915710 | -2.502055 |
| H | 1.787221  | -3.915710 | 2.502055  |
| H | -0.612251 | -4.260660 | -2.502109 |
| H | -0.612251 | -4.260660 | 2.502109  |
| H | -2.817060 | -3.252468 | -2.502148 |
| H | -2.817060 | -3.252468 | 2.502148  |
| H | -4.127144 | -1.212374 | -2.502106 |
| H | -4.127144 | -1.212374 | 2.502106  |

|   |           |           |           |
|---|-----------|-----------|-----------|
| H | -4.127144 | 1.212374  | -2.502106 |
| H | -4.127144 | 1.212374  | 2.502106  |
| H | -2.817060 | 3.252468  | -2.502148 |
| C | 4.152652  | -1.219851 | 0.734565  |
| C | 4.152652  | 1.219851  | 0.734565  |
| C | 2.834992  | 3.273129  | 0.734576  |
| C | 0.616203  | 4.287743  | 0.734546  |
| C | -1.798623 | 3.940281  | 0.734616  |
| C | -3.641047 | 2.340989  | 0.734557  |
| C | -4.328078 | 0.000000  | 0.734613  |
| C | -3.641047 | -2.340989 | 0.734557  |
| C | -1.798623 | -3.940281 | 0.734616  |
| C | 0.616203  | -4.287743 | 0.734546  |
| C | 2.834992  | -3.273128 | 0.734576  |
| C | 4.152652  | -1.219851 | -0.734565 |
| C | 4.152652  | 1.219851  | -0.734565 |
| C | 2.834992  | 3.273129  | -0.734576 |
| C | 0.616203  | 4.287743  | -0.734546 |
| C | -1.798623 | 3.940281  | -0.734616 |
| C | -3.641047 | 2.340989  | -0.734557 |
| C | -4.328078 | 0.000000  | -0.734613 |
| C | -3.641047 | -2.340989 | -0.734557 |
| C | -1.798623 | -3.940281 | -0.734616 |
| C | 0.616203  | -4.287743 | -0.734546 |
| C | 2.834992  | -3.273128 | -0.734576 |
| H | -2.817060 | 3.252468  | 2.502148  |
| H | -0.612251 | 4.260660  | -2.502109 |
| H | -0.612251 | 4.260660  | 2.502109  |
| H | 1.787221  | 3.915710  | -2.502055 |
| H | 1.787221  | 3.915710  | 2.502055  |
| H | 3.618456  | 2.326537  | -2.502102 |
| H | 3.618456  | 2.326537  | 2.502102  |
| H | 4.301444  | 0.000000  | 2.502107  |
| H | 4.301444  | 0.000000  | -2.502107 |
| H | 3.618456  | -2.326537 | -2.502102 |
| H | 3.618456  | -2.326537 | 2.502102  |
| C | 3.646198  | 2.344261  | -1.414989 |
| C | 1.800964  | 3.945392  | -1.414936 |
| C | -0.617066 | 4.293459  | -1.415005 |
| C | -2.838712 | 3.277333  | -1.415032 |
| C | -4.158397 | 1.221509  | -1.414985 |
| C | -4.158397 | -1.221509 | -1.414985 |
| C | -2.838712 | -3.277333 | -1.415032 |
| C | -0.617066 | -4.293459 | -1.415005 |
| C | 1.800964  | -3.945392 | -1.414936 |
| C | 3.646198  | -2.344261 | -1.414989 |
| C | 4.333772  | 0.000000  | -1.414979 |

### [11]-CC: BS-UB3LYP geometry

|   |           |           |           |
|---|-----------|-----------|-----------|
| C | 3.658733  | -2.352228 | 1.408428  |
| C | 4.348677  | 0.000000  | 1.408420  |
| C | 3.658733  | 2.352228  | 1.408428  |
| C | 1.807138  | 3.958747  | 1.408362  |
| C | -0.619146 | 4.307964  | 1.408432  |
| C | -2.848424 | 3.288442  | 1.408452  |
| C | -4.172721 | 1.225671  | 1.408408  |
| C | -4.172721 | -1.225672 | 1.408408  |
| C | -2.848424 | -3.288442 | 1.408452  |
| C | -0.619146 | -4.307964 | 1.408432  |
| C | 1.807138  | -3.958747 | 1.408362  |
| H | 1.797222  | -3.937513 | -2.496210 |
| H | 1.797222  | -3.937513 | 2.496210  |
| H | -0.615648 | -4.284398 | -2.496270 |
| H | -0.615648 | -4.284398 | 2.496270  |
| H | -2.832981 | -3.270648 | -2.496301 |
| H | -2.832981 | -3.270648 | 2.496301  |
| H | -4.150445 | -1.219155 | -2.496257 |
| H | -4.150445 | -1.219155 | 2.496257  |
| H | -4.150445 | 1.219155  | -2.496257 |
| H | -4.150445 | 1.219155  | 2.496257  |
| H | -2.832981 | 3.270648  | -2.496301 |
| C | 4.162176  | -1.222618 | 0.728745  |
| C | 4.162176  | 1.222618  | 0.728745  |
| C | 2.841478  | 3.280531  | 0.728765  |
| C | 0.617598  | 4.297386  | 0.728717  |
| C | -1.802718 | 3.949124  | 0.728799  |
| C | -3.649383 | 2.346258  | 0.728722  |
| C | -4.338098 | 0.000000  | 0.728774  |
| C | -3.649383 | -2.346258 | 0.728722  |
| C | -1.802718 | -3.949124 | 0.728799  |
| C | 0.617598  | -4.297386 | 0.728717  |
| C | 2.841478  | -3.280531 | 0.728765  |
| C | 4.162176  | -1.222618 | -0.728745 |
| C | 4.162176  | 1.222618  | -0.728745 |
| C | 2.841478  | 3.280531  | -0.728765 |
| C | 0.617598  | 4.297386  | -0.728717 |
| C | -1.802718 | 3.949124  | -0.728799 |
| C | -3.649383 | 2.346258  | -0.728722 |
| C | -4.338098 | 0.000000  | -0.728774 |
| C | -3.649383 | -2.346258 | -0.728722 |
| C | -1.802718 | -3.949124 | -0.728799 |
| C | 0.617598  | -4.297386 | -0.728717 |

|   |           |           |           |
|---|-----------|-----------|-----------|
| C | 2.841478  | -3.280531 | -0.728765 |
| H | -2.832981 | 3.270648  | 2.496301  |
| H | -0.615648 | 4.284398  | -2.496270 |
| H | -0.615648 | 4.284398  | 2.496270  |
| H | 1.797222  | 3.937513  | -2.496210 |
| H | 1.797222  | 3.937513  | 2.496210  |
| H | 3.638889  | 2.339567  | -2.496271 |
| H | 3.638889  | 2.339567  | 2.496271  |
| H | 4.325678  | 0.000000  | 2.496269  |
| H | 4.325678  | 0.000000  | -2.496269 |
| H | 3.638889  | -2.339567 | -2.496271 |
| H | 3.638889  | -2.339567 | 2.496271  |
| C | 3.658733  | 2.352228  | -1.408428 |
| C | 1.807138  | 3.958747  | -1.408362 |
| C | -0.619146 | 4.307964  | -1.408432 |
| C | -2.848424 | 3.288442  | -1.408452 |
| C | -4.172721 | 1.225671  | -1.408408 |
| C | -4.172721 | -1.225672 | -1.408408 |
| C | -2.848424 | -3.288442 | -1.408452 |
| C | -0.619146 | -4.307964 | -1.408432 |
| C | 1.807138  | -3.958747 | -1.408362 |
| C | 3.658733  | -2.352228 | -1.408428 |
| C | 4.348677  | 0.000000  | -1.408420 |
